# Supplementary material for: Association between cancer and contact allergy: a linkage study
Source: PubMed Central journal article supplement — BMJ Open. 2011 Jul 11;1(1):e000084. doi: 10.1136/bmjopen-2011-000084 (PMC3191431; doi:10.1136/bmjopen-2011-000084), 2011-07-11
Supplement: bmjopen-2011-000084.draft_revisions.pdf [file bmjopen-2011-000084.draft_revisions.pdf]

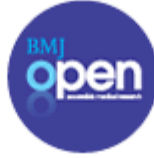

## Association between Cancer and Contact Allergy- a linkage Study

|                               |                                                                                                                                                                                                                                                                                                                                                                                                                                                                                          |
|-------------------------------|------------------------------------------------------------------------------------------------------------------------------------------------------------------------------------------------------------------------------------------------------------------------------------------------------------------------------------------------------------------------------------------------------------------------------------------------------------------------------------------|
| Journal:                      | <i>BMJ Open</i>                                                                                                                                                                                                                                                                                                                                                                                                                                                                          |
| Manuscript ID:                | bmjopen-2011-000084                                                                                                                                                                                                                                                                                                                                                                                                                                                                      |
| Article Type:                 | Research                                                                                                                                                                                                                                                                                                                                                                                                                                                                                 |
| Date Submitted by the Author: | 01-Feb-2011                                                                                                                                                                                                                                                                                                                                                                                                                                                                              |
| Complete List of Authors:     | Engkilde, Kaare; Copenhagen University Hospital Gentofte, National Allergy Research Centre. Department of Dermato-Allergology<br>Thyssen, Jacob; Gentofte Hospital, University of Copenhagen, Department of Dermatology<br>Menné, Torkil; Copenhagen University Hospital Gentofte, National Allergy Research Centre. Department of Dermato-Allergology<br>Johansen, Jeanne; Copenhagen University Hospital Gentofte, National Allergy Research Centre. Department of Dermato-Allergology |
| <b>Subject Heading</b>:       | Dermatology                                                                                                                                                                                                                                                                                                                                                                                                                                                                              |
| Keywords:                     | EPIDEMIOLOGY, Dermatological tumours < ONCOLOGY, Breast tumours < ONCOLOGY, Urological tumours < ONCOLOGY                                                                                                                                                                                                                                                                                                                                                                                |
|                               |                                                                                                                                                                                                                                                                                                                                                                                                                                                                                          |

SCHOLARONE™  
Manuscripts

# Title: Association between Cancer and Contact Allergy– a linkage Study

**Running head:** Association between Cancer and Contact Allergy

Word count: 2608words - Table count: 2 tables

## Authors:

Kaare Engkilde, Jacob P. Thyssen, Torkil Menné, Jeanne D. Johansen

## Affiliation:

National Allergy Research Centre, Department of Dermato-Allergology, Copenhagen University Hospital Gentofte, University of Copenhagen  
Niels Andersens Vej 65  
DK-2900 Hellerup  
Denmark

## Corresponding author:

Kaare Engkilde  
National Allergy Research Centre  
Ledreborg Allé 40, 1.floor  
DK-2820 Gentofte  
Denmark  
Tel: +45 39 77 73 00  
Fax: +45 39 77 71 18  
Email: [kaaeng02@geh.regionh.dk](mailto:kaaeng02@geh.regionh.dk)

## Article focus

- Cancer and allergy have previously been shown to be associated. Mostly the associations found are inverse, which have found support in the immune surveillance theory, as an enhanced tumour immunosurveillance could be hypothesized in allergic individuals.
- These epidemiological studies have predominantly been done on type I allergy, while the present study finds comparative association between type IV allergy and cancer.

## Key messages

- The present study adds knowledge about associations between contact allergy and cancer, which have not previously been investigated.
- Of interest, we find an association between bladder cancer and contact allergy. Though we don't have enough power to study specific allergen association, this is interesting as an association between bladder cancer and hair dye use have previously been found.

## Strengths and limitations of this study

- The present study is unique in looking at cancer and its possible association to a type IV allergy, and can only be done due to large validated patient registers
- As this is not a prospective cohort study, it lacks the possibility to prove causation

## Possible manuscript reviewers:

Wolfgang Uter, Department of Medical Informatics, Friedrich-Alexander-University Erlangen-Nürnberg. Email: [wolfgang.uter@rzmail.uni-erlangen.de](mailto:wolfgang.uter@rzmail.uni-erlangen.de)

Howard Maibach, Department of Dermatology, University of California, San Francisco, USA.  
Email: [MaibachH@derm.ucsf.edu](mailto:MaibachH@derm.ucsf.edu)

1  
2  
3  
4  
5  
6  
7  
8  
9  
10  
11  
12  
13  
14  
15  
16  
17  
18  
19  
20  
21  
22  
23  
24  
25  
26  
27  
28  
29  
30  
31  
32  
33  
34  
35  
36  
37  
38  
39  
40  
41  
42  
43  
44  
45  
46  
47  
48  
49  
50  
51  
52  
53  
54  
55  
56  
57  
58  
59  
60

1 **Funding statement:**

2 This research received no specific grant from any funding agency in the public, commercial or not-  
3 for-profit sectors, though we are grateful for general financial support from Aage Bang's  
4 Foundation and The Capital Region's Research Foundation.

5 **Competing interest's statement**

6 The authors declare they have no competing interests

7 **Contributor statements**

8 KE, TM and JDU designed the study. KE and JPT analysed and interpreted the data. KE and JPT  
9 drafted the manuscript and all authors revised it critically. All authors made final approval of the  
10 version to be published

## 1 **Abstract**

### 2 **Background:**

3 Contact allergy is a prevalent. It is estimated that about 20% of the general population is allergic to  
4 one or more of the chemicals that constitutes the baseline patch test panel. While many studies have  
5 investigated associations between type I allergic disorders and cancer, only very few studies have  
6 investigated the association between cancer and contact allergy. We therefore aimed to investigate  
7 the possible association between a contact allergy and cancer by linking two clinical databases.

### 8 **Methods:**

9 Record linkage of two different registers was performed; 1) a tertiary hospital register of dermatitis  
10 patient's patch tested for contact allergy and 2) a nation wide cancer register (the Danish Cancer  
11 Register). After linkage of the two registers, only cancer subtypes with 40 or more patients  
12 registered were included in the following analysis. The final associations were evaluated by logistic  
13 regression analysis.

### 14 **Results:**

15 An inverse association between contact allergy and respectively, non-melanoma skin- and breast  
16 cancer was identified in both genders, and an inverse trend for brain cancer was found in women  
17 with contact allergy. Furthermore, a positive association between contact allergy and bladder cancer  
18 was found.

### 19 **Conclusion:**

20 Contact allergy was significantly associated with three cancer groups. Two of these (breast and non-  
21 melanoma skin cancer) were inversely associated with contact allergy, and additionally brain cancer  
22 in women had a trend for an inverse association. This tend to support the immunosurveillance  
23 hypothesis (i.e. sufferers of allergy are less likely to get cancer due to a triggered immune system),  
24 while the positive association to bladder cancer possibly could be due to accumulations of chemical  
25 metabolites in the bladder. However, the background for these associations is uncertain and not  
26

1  
2 1 necessarily the result of causality. Nevertheless, our findings add to the limited knowledge that  
3  
4 2 exists about contact allergy and the hazards of cancers.  
5  
6  
7  
8  
9  
10  
11  
12  
13  
14  
15  
16  
17  
18  
19  
20  
21  
22  
23  
24  
25  
26  
27  
28  
29  
30  
31  
32  
33  
34  
35  
36  
37  
38  
39  
40  
41  
42  
43  
44  
45  
46  
47  
48  
49  
50  
51  
52  
53  
54  
55  
56  
57  
58  
59  
60

For peer review only

## 1 Introduction

2 About 20% of Danish adults are contact allergic to at least one of frequent chemicals and metals in  
3 our environment <sup>1,2</sup>. Contact allergy is caused by skin contact with low molecular weight non-  
4 protein chemicals, referred to as haptens, and can progress to allergic contact dermatitis if re-  
5 exposure exceeds the individual threshold <sup>3</sup>. Allergic contact dermatitis is a cutaneous delayed-type  
6 hypersensitivity reaction, mediated by hapten-specific T-cells, in which CD8+ type 1 T-cells are  
7 effector cells in normal contact hypersensitivity responses, while CD4+ T-cells are mainly endowed  
8 with down-regulatory functions <sup>4</sup>. A possible association between allergic hypersensitivity reactions,  
9 as observed in atopic diseases and the unrestrained cell growth in cancer has intrigued researchers  
10 for decades. Studies have reported both positive and inverse associations for allergic disorders,  
11 while some have not found any significant associations, reviewed in Sherman et al. <sup>5</sup>. Most current  
12 epidemiological studies indicate that atopic diseases may be associated with a reduced risk of  
13 cancer <sup>6</sup>. However, one important problem affecting many epidemiological studies on associations  
14 between atopy and cancer is the variability between studies in the definition of atopy. Additionally,  
15 some studies have included patients with allergic contact dermatitis which is problematic as the  
16 immune response is very different <sup>6</sup>. Few studies have investigated the relationship between contact  
17 allergy and cancer. Contact allergy to metal dental restorations was shown to be a potential risk  
18 factor for intra-oral squamous cell carcinoma <sup>7</sup>, while glioma appear to be inversely associated with  
19 self-reported contact dermatitis <sup>8</sup>. Thus, it remains unclear whether two very prevalent disorders,  
20 cancer and contact allergy, are truly associated, and if so, in what direction. We have previously  
21 shown that contact allergy is inversely associated with some prevalent autoimmune diseases such as  
22 diabetes and inflammatory bowel disease <sup>9-11</sup>. We set out to investigate the possible association  
23 between contact allergy and cancer by using cross-linkage between our contact allergy database and  
24 the national cancer database (The Danish Cancer Registry).

## 1 **Materials and Methods**

### 2 **Study population and allergy testing:**

3 From November 1984 to December 2008, 16,922 (6,113 men and 10,809 women) patients with  
4 dermatitis were patch tested for contact allergy with the European baseline series at the Department  
5 of Dermatology, Gentofte Hospital, Denmark. The outcome of patch testing, sex and date of birth  
6 were recorded in the allergy database. The European baseline series contains the most prevalent  
7 contact allergens in the environment for the European continent. Patch testing was performed on the  
8 upper back using Trolab allergens (Hermal, Reinbek, Germany) and Finn Chambers® (8 mm  
9 Epitest Ltd, Oy, Finland) on Scanpor tape® (Norgesplaster A/S, Alharma, Vennessla, Norway) for  
10 occlusion. Occlusion time was 48 hours and the patches were read on day 2, on day 3 or 4, and on  
11 day 5 or 7 according to international criteria from the International Contact Dermatitis Research  
12 Group (ICDRG)<sup>12;13</sup>. A positive allergic reaction was defined as at least homogeneous erythema  
13 and infiltration in the test area. The database contains information on patch test reading result for  
14 each of the days, but in the present study, a binary variable was constructed. Thus, a positive patch  
15 test reaction at any day of reading to any allergen in the European baseline series was considered  
16 positive.

### 17 **Linkage study:**

18 At birth, or on immigration, all Danish residents are given a unique and personal identifier number,  
19 a CPR-number, which can be used for identification in databases. This enables linkage of individual  
20 data between databases.

21 Using the unique identifier number, the contact allergy database from Gentofte Hospital, a tertiary  
22 referral centre, was linked with the Danish Cancer Registry, which contains codes of cancer  
23 diagnosis from the International Classification of Diseases, 7<sup>th</sup> or 10<sup>th</sup> revision (ICD7 and ICD10.  
24 The Danish Cancer Registry is a population-based registry containing nationwide data on cancer  
25 cases since 1943. The history of the Danish Cancer Registry has been reviewed previously by  
26 Storm et al. 1997<sup>14</sup>. Cancer types were defined according to the Nordic Cancer Registry

1 (NORDCAN Database, <http://www.ancr.nu/nordcan.asp>). The cancer types “other leukemia” and  
2 acute “leukemia” in the NORDCAN database was however omitted from data analyses as we  
3 considered the grouping “leukemia” to cover immunological aspects of this cancer type and be  
4 representative. Table 1 shows cancer types used from the NORDCAN database. Only cancer types,  
5 for which we found 40 or more patients after the linkage, were included in the logistic regression  
6 analyses. Age was calculated as the age at first positive patch test outcome. In case there was no  
7 positive patch test reading, the age at first patch test procedure was used instead. Based on the  
8 number of patients in different age-groups, patients were stratified into five groups: “0-29 years”,  
9 “30-41 years”, “42-52 years”, “53-65 years” and “65< years”.

10 The combined data file was analyzed using logistic regression analysis with the patch test outcome  
11 (contact allergy: “yes” vs. “no”) as the dependent variable and different cancer types as the  
12 independent variables, and controlled for sex and age. Finally, we inserted interaction terms  
13 between gender and each cancer subtype (e.g. sex\*colon cancer, sex\*lung cancer, etc.) in the  
14 regression analysis to test whether we had to stratify the analyses by gender. Odds ratios (ORs) with  
15 95% confidence intervals (CIs) were estimated using logistic regression. All data analysis was done  
16 using SPSS version 15 (SPSS Inc., Chicago, IL, USA)

## 18 Results

19 Among 16,922 patients patch tested in the selected time period, 6,065 (35.8%) had a positive  
20 reaction to at least one allergen on at least one occurrence. The prevalence of contact allergy was  
21 however different between the sexes, as the prevalence was 26.1% in male patients and 41.4% in  
22 female patients. The study population has previously been detailed (Carlsen, BC et al. 2007)<sup>15</sup>.  
23 Briefly, the mean and median prevalence of contact allergy across test years were respectively,  
24 37.1 % (SD 3.37) and 36.8 % (Range 28.3% - 43.9%). Thus, only small changes in the frequency of  
25 positive reactions were observed across test years.



1  
2 1 After linkage with the Danish Cancer Registry, 3,200 (18.9%) dermatitis patients were identified  
3  
4 2 with a benign tumour and/or a malignant cancer diagnosis, and 1,207 (37.7%) of these also had a  
5  
6 3 positive patch test reaction. The distribution within different cancer groups (with  $\geq 40$  cases) is  
7  
8 4 shown in Table 1. Crude data analysis revealed a positive and significant association between being  
9  
10 5 contact allergic and being registered in the cancer registry (Mantel-Haenszel common OR = 1.1;  
11  
12 6 CI95%= 1.02-1.20). Using logistic regression analyses with contact allergy as the dependent  
13  
14 7 variable, we calculated odds ratios for different cancer groups and adjusted the analysis for sex and  
15  
16 8 age. Breast and non-melanoma skin cancer in both genders were found to be inversely and  
17  
18 9 significantly associated with contact allergy, while there was a trend for an inverse association  
19  
20 10 between contact allergy and brain cancer in women. Bladder cancer was found to be positively and  
21  
22 11 significantly associated with contact allergy. The sex specific association for brain cancer was  
23  
24 12 identified by investigating different interaction terms between cancer subtypes and gender.  
25  
26 13 However, we only found a significant interaction term for brain/CNS cancer. Thus, when a  
27  
28 14 subsequent adjusted regression analysis was performed in female dermatitis patients only, a trend  
29  
30 15 towards an inverse association was found between brain/CNS cancer and contact allergy; ( $p =$   
31  
32 16 0.080; OR = 0.36 (CI95%= 0.12-1.13). Table 2 shows the cancer types, adjusted for age and sex,  
33  
34 17 which were associated with contact allergy. The cancer types were Breast cancer (OR= 0.80;  
35  
36 18 95%CI = 0.65-0.98), skin cancer (non-melanoma) (OR = 0.83; 95%CI = 0.70-0.97), brain/CNS  
37  
38 19 cancer in women (OR=0.36; 95%CI = 0.12-1.13) and bladder cancer which were positively  
39  
40 20 associated with contact allergy (OR = 1.44; 95%CI = 1.02-2.05).  
41  
42  
43  
44  
45  
46  
47  
48  
49  
50  
51  
52

## 53 22 Discussion

54  
55 23 We found a significant and inverse association between contact allergy and, respectively, breast  
56  
57 24 cancer and non-melanoma skin cancer and a significant and positive association between contact  
58  
59 25 allergy and bladder. Additionally, brain/CNS cancer in women had a trend toward an inversely  
60  
26 associated with contact allergy. The associations were identified by performing record linking of

1  
2 1 two databases: one of contact allergy test outcomes and one of cancer diagnoses, i.e. the Danish  
3  
4 2 Cancer Registry. Patients with contact allergy entered the allergy database following referral to a  
5  
6 3 tertiary university dermatology clinic, generally because of chronic dermatitis and by referral from  
7  
8 4 private dermatology clinics and general physicians. Patch testing classified the patients into groups  
9  
10 5 with and without contact allergy (based on the outcome of patch testing). Apparently, those with  
11  
12 6 positive patch test reactions had a decreased risk of having breast cancer and non-melanoma skin  
13  
14 7 cancer, while they had an increased risk of having bladder cancer. Additionally, women with  
15  
16 8 positive patch test reactions had reduced risk of brain\*/CNS cancer (insignificant trend). These  
17  
18 9 associations are interesting since hospitalization bias would generally lead to a positive association  
19  
20 10 and not a negative association. Additionally, possible associations may have been diluted as both  
21  
22 11 cases and controls were from the same database consisting of patch tested dermatitis patient.  
23  
24 12 Population-based studies are often preferable to patient-based studies by virtue of unbiased  
25  
26 13 estimation of prevalence and risk; however when evaluating risk factors for contact allergy they  
27  
28 14 often have limited power<sup>16</sup>.  
29  
30 15 We chose to use logistic regression analyses for several reasons. First, the time span from the  
31  
32 16 development of contact allergy to the diagnosis was established is unknown and likewise for cancer.  
33  
34 17 Second, our objective was not to establish causality but rather to test whether a skewed immune  
35  
36 18 system towards delayed type hypersensitivity is positively or negatively associated with cancer.  
37  
38 19 Third, we have with success applied this type of regression analysis in previous studies  
39  
40 20 investigating diabetes and inflammatory bowel disease<sup>(10;11)</sup>. Fourth, it has been suggested that the  
41  
42 21 advantages of Cox regression are mainly found when analyzing high baseline risks which was not  
43  
44 22 the case in this study<sup>17</sup>. .  
45  
46 23 The allergy database had a median age of 47 years, and the patients that also appeared in the cancer  
47  
48 24 register had a median age of 60 years. Some of the analyzed patients may therefore develop cancer  
49  
50 25 when they get older; however with a median age of 47 years, some of the malignant tumors may  
51  
52 26 already have developed. It should be emphasized that contact allergy to prevalent allergens such as  
53  
54  
55  
56  
57  
58  
59  
60

1 nickel and cobalt is typically developed early in life, i.e. prior to development of most cancers.  
2  
3  
4 2 There are more females than males in the allergy database, and likewise there are also more females  
5  
6  
7 3 with a positive patch test reactions, which is in accordance with the literature <sup>15</sup>.  
8  
9 4 The present study is unique in the sense that it is only possibly to perform record cross-linkage of  
10  
11  
12 5 registers due to the personal identifier given to all Danish citizens at birth or at immigration.  
13  
14 6 Furthermore, the allergen database is composed of patients patch tested at a hospital in the capital  
15  
16 7 region of Denmark, a region where there is limited industrial exposure due to pesticide  
17  
18 8 manufacturing, synthetic rubber processing, petrochemical refinery etc. that might lead to cancer.  
19  
20 9 Instead many of the patients with contact allergy are allergic to cosmetic ingredients and metals  
21  
22  
23 10 from jewellery which gives no immediate confounding due to working conditions known to cause  
24  
25  
26 11 cancer. A negative patch test response might be due to tolerance of the individual as most  
27  
28 12 individuals are exposed to contact allergens, and a positive patch test response could therefore be  
29  
30  
31 13 implicative of an efficient immune system lending support to the immunosurveillance hypothesis.  
32  
33 14 The positive association to bladder cancer might be due to accumulations of metabolites from  
34  
35 15 contact allergens in the bladder, which is somewhat supported by a study showing an increased  
36  
37 16 frequency of micronuclei in urothelial cells of hair dye users <sup>18</sup>.  
38  
39  
40 17 We cannot account for smoking in our study, although smoking may increase the risk of developing  
41  
42 18 nickel contact allergy and some types of cancer <sup>19;20</sup>. However, we do not find any association to  
43  
44 19 lung or oral cancers, which are positively associated with smoking <sup>21</sup>. We do however find a  
45  
46  
47 20 positive association with bladder cancer that could be somewhat caused by smoking, as smoking is  
48  
49 21 a known risk factor for bladder cancer <sup>22</sup>. Smoking can additionally be a risk factor for non-  
50  
51 22 melanoma skin cancer <sup>23;24</sup>, a modest risk factor for brain cancer <sup>25;26</sup> and might be a risk factor for  
52  
53  
54 23 breast cancer <sup>27</sup>, however as these cancer types were inversely associated with contact allergy, a  
55  
56 24 bias caused by smoking would therefore rather have weakened the association. Most of contact  
57  
58  
59 25 allergy patients have been treated intermittently with topical steroids and only a minority with  
60  
26 systemic immunosuppressants. The later treatment may be associated with non-melanoma skin

1  
2 1 cancer as TNF- $\alpha$ -inhibitors and prednisone have been shown to increase the risk of non-melanoma  
3  
4 2 skin cancer in rheumatoid arthritis patients <sup>28</sup>. Additionally, a study on squamous cell carcinoma  
5  
6 3 found a positive association in patients hospitalized for chronic diseases including skin disease and  
7  
8 4 among these allergic contact dermatitis <sup>29</sup>. In our study, we found an inverse association between  
9  
10 5 contact allergy and non-melanoma skin cancer, and treatment bias could possibly have weakened  
11  
12 6 this inverse association  
13

14  
15  
16 7 Self-reported contact eczema have previously been found to be inversely correlated to glioma and  
17  
18 8 meningioma <sup>8</sup>. The self-reported contact eczema even had the lowest OR of any of the allergic  
19  
20 9 conditions for both glioma and meningioma, though the confidence interval for meningioma was  
21  
22 10 wide and close to one. Glioma patients have been shown to suffer from impaired immunity <sup>30</sup>,  
23  
24 11 whether the suppression is evident before diagnosis of the tumour is not known. If the reduced risk  
25  
26 12 associated with allergies was an effect of immunosuppression induced by the tumour, current  
27  
28 13 allergic diseases would be expected to be associated with a decreased risk. It has been suggested  
29  
30 14 that hair dyeing can increase the risk of glioma <sup>31;32</sup>; however we find an inverse association even  
31  
32 15 though hair dyeing is a risk factor for development of e.g. p-phenylenediamine (PPD) contact  
33  
34 16 allergy. Hair dyeing may additionally be a risk factor for the development of bladder cancer <sup>18;33</sup>. In  
35  
36 17 our study we find a positive association between contact allergy and bladder cancer, which may be  
37  
38 18 caused by PPD contact allergy. Hair dyeing does not appear to be related with breast cancer <sup>34</sup>. It  
39  
40 19 would have been interesting if we could have analyzed possible association between specific  
41  
42 20 allergens and the significant cancer types, in the current dataset. However, we do not have enough  
43  
44 21 power to analyze these associations.  
45  
46  
47  
48  
49

50  
51 22 Different hypothesis have been suggested to explain the association between allergy and cancer. To  
52  
53 23 explain positive associations the “antigenic stimulation” hypothesis has been suggested, in which it  
54  
55 24 is speculated that the increased stimulation of cell growth in allergy and chronic inflammation  
56  
57 25 increase the likelihood of mutation of dividing stem cells and malignant proliferation <sup>5</sup>. To explain  
58  
59 26 inverse associations, the immunosurveillance hypothesis has been suggested in which the allergic  
60

1 symptoms is the side effect of hyperimmunity and are therefore not the result of causation.  
2  
3  
4 2 Additionally, tumours may suppress the immune system systemically and in the microenvironment  
5  
6  
7 3 of the tumour <sup>35</sup>, as seen for glioma patients that have a lower count of CD4+T cells overall and an  
8  
9  
10 4 increased fraction of CD4+FOXP3+T cells in the remaining fraction <sup>36</sup>  
11  
12 5 In conclusion contact allergy was found to be associated with four different cancer subtypes. Most  
13  
14 6 of the associations were inverse, which might support the immunosurveillance hypothesis. The  
15  
16 7 reason for these relations is uncertain and not necessarily the result of causality. More refined  
17  
18 8 analyses, adjusting for social class, smoking e.g. and studies focusing on specific chemical  
19  
20 9 exposures are required to further increase our understanding of the role of contact allergies in the  
21  
22  
23 10 development of cancer. However, if these relations are etiological, it has implications for  
24  
25  
26 11 understanding how contact allergy can affect cancer development and vice versa.  
27  
28 12 Nevertheless, our findings add to the limited knowledge that exists about contact allergy and the  
29  
30  
31 13 hazards of cancers.  
32  
33 14

## 36 15 **Acknowledgments**

37  
38  
39 16 Financial support from Aage Bang's Foundation and The Capital Region's Research Foundation is  
40  
41 17 gratefully acknowledged.  
42  
43  
44  
45 18  
46  
47  
48  
49  
50  
51  
52  
53  
54  
55  
56  
57  
58  
59  
60

1  
2 1 **References**  
3  
4  
5

- 6 2 1. Nielsen NH, Linneberg A, Menne T *et al.* Allergic contact sensitization in an adult Danish  
7 3 population: two cross-sectional surveys eight years apart (the Copenhagen Allergy Study).  
8 4 *Acta Derm.Venereol.* 2001; **81**: 31-4.  
9  
10  
11 5 2. Thyssen JP, Linneberg A, Menne T *et al.* Contact allergy to allergens of the TRUE-test  
12 6 (panels 1 and 2) has decreased modestly in the general population. *Br.J.Dermatol.* 2009; **161**:  
13 7 1124-9.  
14  
15  
16  
17 8 3. Rustemeyer T, van Hoogstraten IMW, von Blomberg BM *et al.* Mechanisms in Allergic  
18 9 Contact Dermatitis. In: *Contact Dermatitis* (Frosch,PJ, Menné,T, Lepoittevin,J-P, eds), 4th.  
19 10 edn. Berlin Heidelberg: Springer, 2006: 11-43.  
20  
21  
22  
23 11 4. Vocanson M, Hennino A, Chavagnac C *et al.* Contribution of CD4+ and CD8+ T-cells in  
24 12 contact hypersensitivity and allergic contact dermatitis. *Expert Review of Clinical*  
25 13 *Immunology* 2005; **1**: 75-86.  
26  
27  
28 14 5. Sherman PW, Holland E, Sherman JS. Allergies: Their Role in Cancer Prevention. *Quarterly*  
29 15 *Review of Biology* 2008; **83**: 339-62.  
30  
31  
32  
33 16 6. Wang H, Diepgen TL. Is atopy a protective or a risk factor for cancer? A review of  
34 17 epidemiological studies. *Allergy* 2005; **60**: 1098-111.  
35  
36  
37 18 7. Hougeir FG, Yiannias JA, Hinni ML *et al.* Oral metal contact allergy: a pilot study on the  
38 19 cause of oral squamous cell carcinoma. *International Journal of Dermatology* 2006; **45**: 265-  
39 20 71.  
40  
41  
42  
43 21 8. Wigertz A, Lonn S, Schwartzbaum J *et al.* Allergic conditions and brain tumor risk. *Am.J*  
44 22 *Epidemiol.* 2007; **166**: 941-50.  
45  
46  
47 23 9. Bangsgaard N, Engkilde K, Thyssen JP *et al.* Inverse relationship between contact allergy and  
48 24 psoriasis: results from a patient- and a population-based study. *Br.J.Dermatol.* 2009.  
49  
50  
51  
52 25 10. Engkilde K, Menne T, Johansen JD. Inflammatory bowel disease in relation to contact allergy:  
53 26 a patient-based study. *Scand.J Gastroenterol.* 2007; **42**: 572-6.  
54  
55  
56 27 11. Engkilde K, Menné T, Johansen JD. Inverse relationship between allergic contact dermatitis  
57 28 and type 1 diabetes mellitus: a retrospective clinic-based study. *Diabetologia* 2006; **49**: 644-7.  
58  
59  
60 29 12. Wilkinson DS, Fregert S, Magnusson B *et al.* Terminology of contact dermatitis. *Acta*  
30 *Derm.Venereol.* 1970; **50**: 287-92.

- 1  
2 1 13. Wahlberg JE, Lindberg M. Patch Testing. In: *Contact Dermatitis* (Frosch,PJ, Menné,T,  
3 2 Lepoittevin,J-P, eds), 4th edn. Berlin Heidelberg: Springer, 2006: 365-90.  
4  
5  
6 3 14. Storm HH, Michelsen EV, Clemmensen IH *et al.* The Danish Cancer Registry - history,  
7 4 content, quality and use. *Danish Medical Bulletin* 1997; **44**: 535-9.  
8  
9  
10  
11 5 15. Carlsen BC, Menne T, Johansen JD. 20 Years of standard patch testing in an eczema  
12 6 population with focus on patients with multiple contact allergies. *Contact Dermatitis* 2007;  
13 7 **57**: 76-83.  
14  
15  
16 8 16. Uter W, Pfahlberg A, Gefeller O *et al.* Risk factors for contact allergy to nickel - results of a  
17 9 multifactorial analysis. *Contact Dermatitis* 2003; **48**: 33-8.  
18  
19  
20  
21 10 17. Langner, I, Bender, R, Lenz-Tönjes, R, Küchenhoff, H, and Blettner, M. Bias of Maximum-  
22 11 Likelihood estimates in logistic and Cox regression models: A comparative simulation study.  
23 12 Discussion Paper 362 Collaborative Research Center 386 Munich , 1-18. 2003.  
24 13 Ref Type: Generic  
25  
26  
27  
28 14 18. Espinoza F, Silverman D, Kogevinas M *et al.* Micronuclei assessment in the urothelial cells of  
29 15 women using hair dyes and its modulation by genetic polymorphisms. *Cancer Lett.* 2008; **263**:  
30 16 259-66.  
31  
32  
33 17 19. Linneberg A, Nielsen NH, Menne T *et al.* Smoking might be a risk factor for contact allergy.  
34 18 *J Allergy Clin.Immunol.* 2003; **111**: 980-4.  
35  
36  
37  
38 19 20. Thyssen JP, Johansen JD, Menne T *et al.* Effect of Tobacco Smoking and Alcohol  
39 20 Consumption on the Prevalence of Nickel Sensitization and Contact Sensitization. *Acta*  
40 21 *Dermato-Venereologica* 2010; **90**: 27-33.  
41  
42  
43 22 21. Gandini S, Botteri E, Iodice S *et al.* Tobacco smoking and cancer: A meta-analysis.  
44 23 *International Journal of Cancer* 2008; **122**: 155-64.  
45  
46  
47  
48 24 22. Baris D, Karagas MR, Verrill C *et al.* A Case-Control Study of Smoking and Bladder Cancer  
49 25 Risk: Emergent Patterns Over Time. *Journal of the National Cancer Institute* 2009; **101**:  
50 26 1553-61.  
51  
52  
53 27 23. De Hertog SAE, Wensveen CAH, Bastiaens MT *et al.* Relation between smoking and skin  
54 28 cancer. *Journal of Clinical Oncology* 2001; **19**: 231-8.  
55  
56  
57  
58 29 24. Milan T, Verkasalo PK, Kaprio J *et al.* Malignant skin cancers in the Finnish Twin Cohort: a  
59 30 population-based study, 1976-97. *British Journal of Dermatology* 2002; **147**: 509-12.  
60

- 1  
2 1 25. Efrid JT, Friedman GD, Sidney S *et al.* The risk for malignant primary adult-onset glioma in a  
3 2 large, multiethnic, managed-care cohort: cigarette smoking and other lifestyle behaviors.  
4 3 *Journal of Neuro-Oncology* 2004; **68**: 57-69.  
5  
6  
7  
8 4 26. Silvera SAN, Miller AB, Rohan TE. Cigarette smoking and risk of glioma: A prospective  
9 5 cohort study. *International Journal of Cancer* 2006; **118**: 1848-51.  
10  
11  
12 6 27. Cui Y, Miller AB, Rohan TE. Cigarette smoking and breast cancer risk: update of a  
13 7 prospective cohort study. *Breast Cancer Research and Treatment* 2006; **100**: 293-9.  
14  
15  
16 8 28. Chakravarty EF, Michaud K, Wolfe F. Skin cancer, rheumatoid arthritis, and tumor necrosis  
17 9 factor inhibitors. *Journal of Rheumatology* 2005; **32**: 2130-5.  
18  
19  
20  
21 10 29. Jensen AO, Olesen AB, Dethlefsen C *et al.* Chronic diseases requiring hospitalization and risk  
22 11 of non-melanoma skin cancers - A population based study from Denmark. *Journal of*  
23 12 *Investigative Dermatology* 2008; **128**: 926-31.  
24  
25  
26 13 30. Dix AR, Brooks WH, Roszman TL *et al.* Immune defects observed in patients with primary  
27 14 malignant brain tumors. *Journal of Neuroimmunology* 1999; **100**: 216-32.  
28  
29  
30  
31 15 31. Heineman EF, Ward MH, McComb RD *et al.* Hair Dyes and Risk of Glioma Among  
32 16 Nebraska Women. *Cancer Causes and Control* 2005; **16**: 857-64.  
33  
34  
35 17 32. Bluhm EC, Zahm SH, Fine HA *et al.* Personal Hair Dye Use and Risks of Glioma,  
36 18 Meningioma, and Acoustic Neuroma among Adults. *Am.J.Epidemiol.* 2007; **165**: 63-71.  
37  
38  
39  
40 19 33. Gago-Dominguez M, Castelao JE, Yuan JM *et al.* Use of permanent hair dyes and bladder-  
41 20 cancer risk. *Int.J.Cancer* 2001; **91**: 575-9.  
42  
43  
44 21 34. Zheng T, Holford TR, Mayne ST *et al.* Use of hair colouring products and breast cancer risk:  
45 22 a case-control study in Connecticut. *Eur.J.Cancer* 2002; **38**: 1647-52.  
46  
47  
48  
49 23 35. Rabinovich GA, Gabrilovich D, Sotomayor EM. Immunosuppressive strategies that are  
50 24 mediated by tumor cells. *Annual Review of Immunology* 2007; **25**: 267-96.  
51  
52  
53 25 36. Fecci PE, Mitchell DA, Whitesides JF *et al.* Increased regulatory T-cell fraction amidst a  
54 26 diminished CD4 compartment explains cellular immune defects in patients with malignant  
55 27 glioma. *Cancer Research* 2006; **66**: 3294-302.  
56  
57  
58 28  
59  
60



## Tables

Table 1. Sex specific distribution of cancer types and contact allergy. The cancer types are sorted ascendingly according to the total number of patients with the respective cancer type. Only cancer types with  $\geq 40$  patients were included in the logistic regression analyses.

| CANCER GROUPS<br>(NORDCAN)             | SEX             |                    |              |                 |                    |               | TOTAL         |
|----------------------------------------|-----------------|--------------------|--------------|-----------------|--------------------|---------------|---------------|
|                                        | Men             |                    |              | Women           |                    |               |               |
|                                        | Contact allergy | No contact allergy | Total        | Contact allergy | No contact allergy | Total         |               |
| Pancreas                               | 4               | 11                 | 15           | 13              | 17                 | 30            | 45            |
| Brain/CNS                              | 7               | 15                 | 22           | 30              | 11                 | 41            | 63            |
| Cervix uteri                           | n/a             | n/a                | n/a          | 34              | 30                 | 64            | 64            |
| Leukemia                               | 7               | 27                 | 34           | 24              | 13                 | 37            | 71            |
| Lip, oral cavity and pharynx           | 15              | 30                 | 45           | 16              | 12                 | 28            | 73            |
| Corpus uteri                           | n/a             | n/a                | n/a          | 48              | 38                 | 86            | 86            |
| Rectum and anus                        | 14              | 41                 | 55           | 29              | 17                 | 46            | 101           |
| Melanoma of skin                       | 11              | 32                 | 43           | 40              | 21                 | 61            | 104           |
| Prostate                               | 36              | 86                 | 122          | n/a             | n/a                | n/a           | 122           |
| Colon                                  | 9               | 43                 | 52           | 43              | 29                 | 72            | 124           |
| Bladder etc.                           | 33              | 63                 | 96           | 21              | 22                 | 43            | 139           |
| Lung                                   | 26              | 83                 | 109          | 41              | 42                 | 83            | 192           |
| Colorectal                             | 23              | 83                 | 106          | 71              | 46                 | 117           | 223           |
| Breast                                 | 0               | 0                  | 0            | 248             | 151                | 399           | 399           |
| Skin, non-melanoma                     | 72              | 203                | 275          | 284             | 166                | 450           | 725           |
| All sites but non-melanoma skin cancer | 209             | 531                | 740          | 663             | 452                | 1,115         | 1,855         |
| <b>Total(allergy database)</b>         | <b>1,594</b>    | <b>4,519</b>       | <b>6,113</b> | <b>4,471</b>    | <b>6,338</b>       | <b>10,809</b> | <b>16,922</b> |

1  
2  
3  
4  
5  
6  
7  
8  
9  
10  
11  
12  
13  
14  
15  
16  
17  
18  
19  
20  
21  
22  
23  
24  
25  
26  
27  
28  
29  
30  
31  
32  
33  
34  
35  
36  
37  
38  
39  
40  
41  
42  
43  
44  
45  
46  
47  
48  
49  
50  
51  
52  
53  
54  
55  
56  
57  
58  
59  
60

Table 2 The final analysis outcome including the interaction variable Brain/CNS\*Sex, all adjusted for age and sex

| Cancer groups (NORDCAN) | ICD7 | ICD10                 | p-value | OR   | CI 95%      |
|-------------------------|------|-----------------------|---------|------|-------------|
| Bladder etc.            | 181  | C65-68+ D09.0 + D41.4 | 0.040   | 1.44 | 1.02 - 2.05 |
| Breast                  | 170  | C50                   | 0.035   | 0.80 | 0.65 - 0.98 |
| Skin, non-melanoma      | 191  | C44+C46.0             | 0.021   | 0.83 | 0.70 - 0.97 |
| Brain/CNS               | 193  | C70-72+D32-33+D42-43  | 0.513   | 1.35 | 0.55 - 3.33 |
| Brain/CNS *Sex          | -    | -                     | 0.080   | 0.36 | 0.12 - 1.13 |

For peer review only

STROBE Statement—Checklist of items that should be included in reports of *cohort studies*

|                              | Item No | Recommendation                                                                                                                                                                                                                                                                                                                                                            |
|------------------------------|---------|---------------------------------------------------------------------------------------------------------------------------------------------------------------------------------------------------------------------------------------------------------------------------------------------------------------------------------------------------------------------------|
| <b>Title and abstract</b>    | 1       | (a) Indicate the study's design with a commonly used term in the title or the abstract<br>Yes "a linkage Study" in the title<br><br>(b) Provide in the abstract an informative and balanced summary of what was done and what was found<br><br>Yes                                                                                                                        |
| <b>Introduction</b>          |         |                                                                                                                                                                                                                                                                                                                                                                           |
| Background/rationale         | 2       | Explain the scientific background and rationale for the investigation being reported<br>Yes, explain that type 1 allergy associations have previously been reported and that                                                                                                                                                                                              |
| Objectives                   | 3       | State specific objectives, including any prespecified hypotheses<br>YES                                                                                                                                                                                                                                                                                                   |
| <b>Methods</b>               |         |                                                                                                                                                                                                                                                                                                                                                                           |
| Study design                 | 4       | Present key elements of study design early in the paper<br>YES                                                                                                                                                                                                                                                                                                            |
| Setting                      | 5       | Describe the setting, locations, and relevant dates, including periods of recruitment, exposure, follow-up, and data collection<br>YES                                                                                                                                                                                                                                    |
| Participants                 | 6       | (a) Give the eligibility criteria, and the sources and methods of selection of participants. Describe methods of follow-up<br>YES<br><br>(b) For matched studies, give matching criteria and number of exposed and unexposed                                                                                                                                              |
| Variables                    | 7       | Clearly define all outcomes, exposures, predictors, potential confounders, and effect modifiers. Give diagnostic criteria, if applicable<br>YES                                                                                                                                                                                                                           |
| Data sources/<br>measurement | 8*      | For each variable of interest, give sources of data and details of methods of assessment (measurement). Describe comparability of assessment methods if there is more than one group<br>YES                                                                                                                                                                               |
| Bias                         | 9       | Describe any efforts to address potential sources of bias<br>YES                                                                                                                                                                                                                                                                                                          |
| Study size                   | 10      | Explain how the study size was arrived at<br>YES                                                                                                                                                                                                                                                                                                                          |
| Quantitative variables       | 11      | Explain how quantitative variables were handled in the analyses. If applicable, describe which groupings were chosen and why<br>YES                                                                                                                                                                                                                                       |
| Statistical methods          | 12      | (a) Describe all statistical methods, including those used to control for confounding<br>YES<br><br>(b) Describe any methods used to examine subgroups and interactions<br>YES<br><br>(c) Explain how missing data were addressed<br>N/A<br><br>(d) If applicable, explain how loss to follow-up was addressed<br>N/A<br><br>(e) Describe any sensitivity analyses<br>N/A |

1  
2  
3  
4  
5  
6  
7  
8  
9  
10  
11  
12  
13  
14  
15  
16  
17  
18  
19  
20  
21  
22  
23  
24  
25  
26  
27  
28  
29  
30  
31  
32  
33  
34  
35  
36  
37  
38  
39  
40  
41  
42  
43  
44  
45  
46  
47  
48  
49  
50  
51  
52  
53  
54  
55  
56  
57  
58  
59  
60

| <b>Results</b>           |     |                                                                                                                                                                                                                                                                                                                                                                                                                                                       |
|--------------------------|-----|-------------------------------------------------------------------------------------------------------------------------------------------------------------------------------------------------------------------------------------------------------------------------------------------------------------------------------------------------------------------------------------------------------------------------------------------------------|
| Participants             | 13* | (a) Report numbers of individuals at each stage of study—eg numbers potentially eligible, examined for eligibility, confirmed eligible, included in the study, completing follow-up, and analysed<br>YES were applicable<br>(b) Give reasons for non-participation at each stage<br>N/A<br>(c) Consider use of a flow diagram<br>Not used                                                                                                             |
| Descriptive data         | 14* | (a) Give characteristics of study participants (eg demographic, clinical, social) and information on exposures and potential confounders<br>Not possible<br>(b) Indicate number of participants with missing data for each variable of interest<br>Register data<br>(c) Summarise follow-up time (eg, average and total amount)<br>N/A                                                                                                                |
| Outcome data             | 15* | Report numbers of outcome events or summary measures over time<br>YES                                                                                                                                                                                                                                                                                                                                                                                 |
| Main results             | 16  | (a) Give unadjusted estimates and, if applicable, confounder-adjusted estimates and their precision (eg, 95% confidence interval). Make clear which confounders were adjusted for and why they were included<br>YES<br>(b) Report category boundaries when continuous variables were categorized<br>No continuous variable<br>(c) If relevant, consider translating estimates of relative risk into absolute risk for a meaningful time period<br>N/A |
| Other analyses           | 17  | Report other analyses done—eg analyses of subgroups and interactions, and sensitivity analyses<br>YES                                                                                                                                                                                                                                                                                                                                                 |
| <b>Discussion</b>        |     |                                                                                                                                                                                                                                                                                                                                                                                                                                                       |
| Key results              | 18  | Summarise key results with reference to study objectives<br>YES                                                                                                                                                                                                                                                                                                                                                                                       |
| Limitations              | 19  | Discuss limitations of the study, taking into account sources of potential bias or imprecision. Discuss both direction and magnitude of any potential bias<br>YES                                                                                                                                                                                                                                                                                     |
| Interpretation           | 20  | Give a cautious overall interpretation of results considering objectives, limitations, multiplicity of analyses, results from similar studies, and other relevant evidence<br>YES                                                                                                                                                                                                                                                                     |
| Generalisability         | 21  | Discuss the generalisability (external validity) of the study results<br>YES                                                                                                                                                                                                                                                                                                                                                                          |
| <b>Other information</b> |     |                                                                                                                                                                                                                                                                                                                                                                                                                                                       |
| Funding                  | 22  | Give the source of funding and the role of the funders for the present study and, if applicable, for the original study on which the present article is based<br>No specific funding for the present paper, but 2 general grants, mentioned in the Acknowledgments section                                                                                                                                                                            |

1 \*Give information separately for exposed and unexposed groups.  
2  
3

4 **Note:** An Explanation and Elaboration article discusses each checklist item and gives methodological background and  
5 published examples of transparent reporting. The STROBE checklist is best used in conjunction with this article (freely  
6 available on the Web sites of PLoS Medicine at <http://www.plosmedicine.org/>, Annals of Internal Medicine at  
7 <http://www.annals.org/>, and Epidemiology at <http://www.epidem.com/>). Information on the STROBE Initiative is  
8 available at <http://www.strobe-statement.org>.  
9  
10  
11  
12  
13  
14  
15  
16  
17  
18  
19  
20  
21  
22  
23  
24  
25  
26  
27  
28  
29  
30  
31  
32  
33  
34  
35  
36  
37  
38  
39  
40  
41  
42  
43  
44  
45  
46  
47  
48  
49  
50  
51  
52  
53  
54  
55  
56  
57  
58  
59  
60

For peer review only

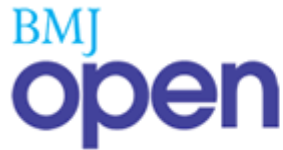

## Association between Cancer and Contact Allergy: a linkage Study

|                               |                                                                                                                                                                                                                                                                                                                                                                                                                                                                                          |
|-------------------------------|------------------------------------------------------------------------------------------------------------------------------------------------------------------------------------------------------------------------------------------------------------------------------------------------------------------------------------------------------------------------------------------------------------------------------------------------------------------------------------------|
| Journal:                      | <i>BMJ Open</i>                                                                                                                                                                                                                                                                                                                                                                                                                                                                          |
| Manuscript ID:                | bmjopen-2011-000084.R1                                                                                                                                                                                                                                                                                                                                                                                                                                                                   |
| Article Type:                 | Research                                                                                                                                                                                                                                                                                                                                                                                                                                                                                 |
| Date Submitted by the Author: | 04-Apr-2011                                                                                                                                                                                                                                                                                                                                                                                                                                                                              |
| Complete List of Authors:     | Engkilde, Kaare; Copenhagen University Hospital Gentofte, National Allergy Research Centre. Department of Dermato-Allergology<br>Thyssen, Jacob; Gentofte Hospital, University of Copenhagen, Department of Dermatology<br>Menné, Torkil; Copenhagen University Hospital Gentofte, National Allergy Research Centre. Department of Dermato-Allergology<br>Johansen, Jeanne; Copenhagen University Hospital Gentofte, National Allergy Research Centre. Department of Dermato-Allergology |
| <b>Subject Heading</b>:       | Dermatology                                                                                                                                                                                                                                                                                                                                                                                                                                                                              |
| Keywords:                     | EPIDEMIOLOGY, Dermatological tumours < ONCOLOGY, Breast tumours < ONCOLOGY, Urological tumours < ONCOLOGY                                                                                                                                                                                                                                                                                                                                                                                |
|                               |                                                                                                                                                                                                                                                                                                                                                                                                                                                                                          |

SCHOLARONE™  
Manuscripts

# Title: Association between Cancer and Contact Allergy: a linkage Study

Deleted: -

**Running head:** Association between Cancer and Contact Allergy

Word count: 1933 words - Table count: 2 tables

Deleted: 2608words -

## Authors:

Kaare Engkilde, Jacob P. Thyssen, Torkil Menné, Jeanne D. Johansen

## Affiliation:

National Allergy Research Centre, Department of Dermato-Allergology, Copenhagen University Hospital Gentofte, University of Copenhagen  
Niels Andersens Vej 65  
DK-2900 Hellerup  
Denmark

## Corresponding author:

Kaare Engkilde  
National Allergy Research Centre  
Ledreborg Allé 40, 1.floor  
DK-2820 Gentofte  
Denmark  
Tel: +45 39 77 73 00  
Fax: +45 39 77 71 18

Email: [kaaeng02@geh.regionh.dk](mailto:kaaeng02@geh.regionh.dk)

Deleted: Mostly the

Deleted: found

Deleted: which have found support in the immune surveillance

Deleted: , as an

Deleted: could be hypothesized

Deleted: se

Deleted: have

Deleted: been done

Deleted: , while

Deleted: finds comparative

Deleted: The present study adds knowledge about associations

Deleted: , which have not previously been investigated. ¶  
• . Of interest, we find an

Deleted: . Though

Deleted: don't have enough power to study specific allergen association, this

Deleted: as an association between bladder cancer and hair dye use have previously been found.

Deleted: The present

Deleted: is unique in looking at

Deleted: to

Deleted: , and can only be done

Deleted: [wolfgang.uter@rzmail.uni-erlangen.de](mailto:wolfgang.uter@rzmail.uni-erlangen.de)Deleted: [MaibachH@derm.ucsf.edu](mailto:MaibachH@derm.ucsf.edu)

## Article focus

• Cancer and allergy have previously been shown to be associated. The associations are mostly inverse, adding weight to the theory that enhanced tumour immunosurveillance is present in allergic individuals.

• The epidemiological studies showing these findings were predominantly on type I allergy; the present study investigated the association between type IV allergy and cancer.

## Key messages

• An association seemingly exists between contact allergy and cancer. In the light of previous findings of an association between bladder cancer and hair-dye use, the association between bladder cancer and contact allergy, we found is interesting.

## Strengths and limitations of this study

- This is a novel study investigating cancer and its possible association with a type IV allergy. The analysis was possible due to large, validated patient registers.
- As this is not a prospective cohort study, it lacks the possibility to prove causation.

## Possible manuscript reviewers:

Wolfgang Uter, Department of Medical Informatics, Friedrich-Alexander-University Erlangen-Nürnberg. Email: [wolfgang.uter@rzmail.uni-erlangen.de](mailto:wolfgang.uter@rzmail.uni-erlangen.de)

Howard Maibach, Department of Dermatology, University of California, San Francisco, USA.

Email: [MaibachH@derm.ucsf.edu](mailto:MaibachH@derm.ucsf.edu)

**Funding statement:**

This research received no specific grant from any funding agency in the public, commercial or not-for-profit sectors; however, we are grateful for general financial support from Aage Bang's Foundation and the Capital Region's Research Foundation.

Deleted: , though

Deleted: The

Deleted: interest's

**Competing interests statement**

The authors declare they have no competing interests.

**Contributor statements**

KE, TM and JDU designed the study. KE and JPT analysed and interpreted the data. KE and JPT drafted the manuscript and all authors revised it critically. All authors gave their final approval of the version to be published

Deleted: made



## Abstract

### Background:

Contact allergy is a prevalent disorder. It is estimated that about 20% of the general population is allergic to one or more of the chemicals that constitute the European baseline patch test panel.

While many studies have investigated associations between type I allergic disorders and cancer, few have looked into the association between cancer and contact allergy, a type IV allergy. By linking two clinical databases, we investigate the possible association between contact allergy and cancer.

### Methods:

Record linkage of two different registers was performed: 1) a tertiary hospital register of dermatitis patients patch tested for contact allergy and 2) a nationwide cancer register (the Danish Cancer Register). After linking the two registers, only cancer subtypes with 40 or more patients registered were included in the analysis. The final associations were evaluated by logistic regression analysis.

### Results:

An inverse association between contact allergy and non-melanoma skin- and breast cancer, respectively, was identified in both sexes, and an inverse trend for brain cancer was found in women with contact allergy. Additionally, a positive association between contact allergy and bladder cancer was found.

### Conclusion:

The inverse associations supports the immunosurveillance hypothesis (i.e. individuals with allergy are less likely to get cancer due to a triggered immune system), while the positive association with bladder cancer could be due to accumulations of chemical metabolites in the bladder. Our findings add to the limited knowledge about contact allergy and the risk of cancer.

Deleted: s

Deleted: only very

Deleted: studies

Deleted: investigated

Deleted: . We therefore aimed to

Deleted: a

Deleted: by linking two clinical databases

Deleted: :

Deleted: patient's

Deleted:

Deleted: linkage of

Deleted: following

Deleted: respectively,

Deleted: genders

Deleted: Furthermore

Deleted: Contact allergy was significantly associated with three cancer groups. Two of these (breast and non-melanoma skin cancer) were inversely associated with contact allergy, and additionally brain cancer in women had a trend for an

Deleted: . This tend to support

Deleted: sufferers of

Deleted: to

Deleted: possibly

Deleted: However, the background for these associations is uncertain and not necessarily the result of causality. Nevertheless, our

Deleted: that exists

Deleted: hazards

Deleted: s

1 **Introduction**

2  
 3 2 About 20% of Danish adults are contact allergic to chemicals and metals common in the  
 4  
 5 3 environment<sup>1,2</sup>. Contact allergy is caused by skin contact with low molecular weight non-protein  
 6  
 7 4 chemicals, referred to as haptens, and can progress to allergic contact dermatitis if re-exposure  
 8  
 9 5 exceeds the individual's threshold<sup>3</sup>. Allergic contact dermatitis is a cutaneous delayed-type  
 10  
 11 6 hypersensitivity reaction, mediated by hapten-specific T-cells<sup>4</sup>. A possible association between type  
 12  
 13 7 1 allergic hypersensitivity reactions, as observed in atopic diseases, and the unrestrained cell growth  
 14  
 15 8 in cancer has long intrigued researchers. Some studies have reported both positive and inverse  
 16  
 17 9 associations for allergic disorders; others have not found any significant associations, reviewed in  
 18  
 19 10 Sherman et al.<sup>5</sup>. Most recent epidemiological studies point towards atopic diseases being associated  
 20  
 21 11 with a reduced risk of cancer<sup>6</sup>. However, a major problem affecting many epidemiological studies  
 22  
 23 12 on associations between atopy and cancer is the different way the studies define atopy. Additionally,  
 24  
 25 13 some studies have included patients with allergic contact dermatitis, which is problematic as the  
 26  
 27 14 immune response differs greatly<sup>6</sup>. To date, few studies have investigated the relationship between  
 28  
 29 15 contact allergy and cancer. Contact allergy to metal dental restorations was found to be a potential  
 30  
 31 16 risk factor for intra-oral squamous cell carcinoma<sup>7</sup>, and glioma appeared inversely associated with  
 32  
 33 17 self-reported contact dermatitis<sup>8</sup>. Thus, it remains unclear whether two prevalent disorders, cancer  
 34  
 35 18 and contact allergy, are truly associated, and if so, in what direction. We have previously shown  
 36  
 37 19 that contact allergy is inversely associated with autoimmune diseases such as type 1 diabetes and  
 38  
 39 20 inflammatory bowel disease<sup>9-11</sup>. This is a descriptive exploratory investigation of the possible  
 40  
 41 21 association between contact allergy and cancer by using cross-linkage between our contact allergy  
 42  
 43 22 database and the national cancer database (the Danish Cancer Registry).

Deleted: at least one of frequent

Deleted: our

Deleted: individual

Deleted: ,

Deleted: , in which CD8+ type 1 T-cells are effector cells in normal contact hypersensitivity responses, while CD4+ T-cells are mainly endowed with down-regulatory functions

Deleted: for decades. Studies

Deleted: , while some

Deleted: current

Deleted: indicate that

Deleted: may be

Deleted: one important

Deleted: variability between studies in the definition of

Deleted: is very different

Deleted: Few

Deleted: shown

Deleted: while

Deleted: appear to be

Deleted: very

Deleted: some prevalent

Deleted: We set out to investigate

Deleted: The

4

## Materials and Methods

### Study population and allergy testing:

From November 1984 to December 2008, [patch tests for contact allergy using the European baseline series were performed on](#) 16,922 (6,113 men and 10,809 women) patients with dermatitis at the Department of Dermatology, Gentofte Hospital, Denmark. The outcome of patch testing, sex and date of birth were recorded in the allergy database. The European baseline series contains the most prevalent contact allergens in the environment for the European continent. Patch testing was performed on the upper back using Trolab allergens (Hermal, Reinbek, Germany) and Finn Chambers® (8 mm Epitest Ltd, Oy, Finland) on Scanpor tape® (Norgesplaster A/S, Alpharma, Vennessla, Norway) for occlusion. Occlusion time was 48 hours and the patches were read on [Day 2](#), on [Day 3](#) or 4, and on [Day 5](#) or 7 according to international criteria from the International Contact Dermatitis Research Group (ICDRG)<sup>12,13</sup>. A positive allergic reaction was defined as at least homogeneous erythema and infiltration in the test area. The database contains information on patch test reading result for each [day](#), but in the present study, a binary variable was constructed. Thus, a positive patch test reaction [on any reading day](#) to any allergen in the European baseline series was considered positive. [The study population has been detailed previously \(Carlsen, BC et al. 2007\)<sup>14</sup>.](#)

### Linkage study:

At birth, or on immigration, all [those with residency in Denmark receive](#) a unique and personal identifier number, a CPR-number, which can be used for identification in databases. This enables linkage of individual data between databases.

[We used](#) the unique identifier number [to link](#) the contact allergy database from Gentofte Hospital, a tertiary referral centre, [with](#) the Danish Cancer Registry, which contains codes of cancer diagnosis from the International Classification of Diseases, 7<sup>th</sup> or 10<sup>th</sup> revision (ICD7 and ICD10). The Danish Cancer Registry is a population-based registry containing nationwide data on cancer cases since 1943. The history of the Danish Cancer Registry [was](#) reviewed by Storm et al. [in](#) 1997<sup>15</sup>. Cancer types were defined according to the Nordic Cancer [Registries](#) (NORDCAN Database,

**Deleted:** were patch tested for contact allergy with the European baseline series

**Deleted:** day

**Deleted:** day

**Deleted:** day

**Deleted:**

**Deleted:** of the days

**Deleted:** at

**Deleted:** day of

**Deleted:** Danish residents are given

**Deleted:** Using

**Deleted:** ,

**Deleted:** was linked

**Deleted:** has been

**Deleted:** previously

**Deleted:**<sup>14</sup>

**Deleted:** Registry

1 1 <http://www.ancr.nu/nordcan.asp>). The cancer types “other leukaemia” and acute “leukaemia” in the  
 2  
 3 2 NORDCAN database were omitted from data analyses as we considered the grouping “leukaemia”  
 4  
 5 3 to cover immunological aspects of this cancer type and be representative. Table 1 shows cancer  
 6  
 7 4 types used from the NORDCAN database. Only cancer types for which we found 40 or more  
 8  
 9 5 patients after the linkage were included in the logistic regression analyses. Age was calculated as  
 10  
 11 6 the age at first positive patch test outcome. When there was no positive patch test reading, the age at  
 12  
 13 7 first patch test procedure was used. Based on the number of patients in different age groups,  
 14  
 15 8 patients were stratified into five groups: 0–29 years, 30–41 years, 42–52 years, 53–65 years and  
 16  
 17 9 65< years.  
 18  
 19 10 The combined data file was analysed using logistic regression analysis with the patch test outcome  
 20  
 21 11 (contact allergy: “yes” vs. “no”) as the dependent variable and different cancer types as the  
 22  
 23 12 independent variables, and controlled for sex and age. Lastly, we inserted interaction terms between  
 24  
 25 13 sex and each cancer subtype (e.g. sex\*colon cancer, sex\*lung cancer, etc.) in the regression analysis  
 26  
 27 14 to test whether we should stratify the analyses by sex. Odds ratios (ORs) with 95% confidence  
 28  
 29 15 intervals (CIs) were estimated using logistic regression. All data analysis was done using SPSS  
 30  
 31 16 version 18 (SPSS Inc., Chicago, IL, USA)

- Deleted: <http://www.ancr.nu/nordcan.asp>
- Deleted: leukemia
- Deleted: leukemia
- Deleted: was however
- Deleted: leukemia
- Deleted: ,
- Deleted: ,
- Deleted: In case
- Deleted: instead
- Deleted: -
- Deleted: “
- Deleted: -
- Deleted: “, “
- Deleted: -
- Deleted: “, “
- Deleted: -
- Deleted: “, “
- Deleted: -
- Deleted: “
- Deleted: “
- Deleted: analyzed
- Deleted: Finally
- Deleted: gender
- Deleted: had to
- Deleted: gender
- Deleted: 15

34 **Results**

35 18  
 36  
 37 19 Among 16,922 patients patch tested in the selected period, 6,065 (35.8%) had a positive reaction to  
 38  
 39 20 at least one allergen on at least one occasion. The prevalence of contact allergy, however, differed  
 40  
 41 21 between the sexes, as the prevalence was 26.1% in male patients and 41.4% in female patients.  
 42  
 43 22 After linkage with the Danish Cancer Registry, 3,200 (18.9%) dermatitis patients were identified  
 44  
 45 23 with a benign tumour and/or a malignant cancer diagnosis, and 1,207 (37.7%) of these also had a  
 46  
 47 24 positive patch test reaction. The distribution within different cancer groups (with ≥ 40 cases) is  
 48  
 49 25 shown in Table 1. Crude data analysis revealed a positive and significant association between being  
 50  
 51 26 contact allergic and being registered in the cancer registry (Mantel-Haenszel common OR = 1.1; p-

- Deleted: time
- Deleted: occurrence
- Deleted: was
- Deleted: different
- Deleted: The study population has previously been detailed (Carlsen, BC et al. 2007)<sup>15</sup>. Briefly, the mean and median prevalence of contact allergy across test years were respectively, 37.1 % (SD 3.37) and 36.8 % (Range 28.3% - 43.9%). Thus, only small changes in the frequency of positive reactions were observed across test years.
- Deleted: ≥

52  
 53  
 54  
 55  
 56  
 57  
 58  
 59  
 60

**Deleted:** -

**Deleted:** odds ratios

**Deleted:** genders

**Deleted:** , while

**Deleted:** in women

**Deleted:** gender

**Deleted:** only

**Deleted:** only

**Deleted:** ;

**Deleted:** -

**Field Code Changed**

**Deleted:** s

**Deleted:** were associated with contact allergy. The cancer types were Breast cancer (OR= 0.80; 95%CI = 0.65-0.98),

**Deleted:** ) (OR = 0.83; 95%CI = 0.70-0.97), brain/CNS cancer in women (OR=0.36; 95%CI = 0.12-1.13) and bladder cancer which were positively associated with contact allergy (OR = 1.44; 95%CI = 1.02-2.05)

**Deleted:** We found a significant and inverse association between contact allergy and, respectively, breast cancer and non-melanoma skin cancer and a significant and positive association between contact allergy and bladder. Additionally, brain/CNS cancer in women had a trend toward an inversely associated with contact allergy. The associations were identified by performing record linking of two databases: one of contact allergy test outcomes and one of cancer diagnoses, i.e. the Danish Cancer Registry. Patients with contact allergy entered the allergy database following referral to a tertiary university dermatology clinic, generally because of chronic dermatitis and by referral from private dermatology clinics and general physicians. Patch testing classified the patients into groups with and without contact allergy (based on the outcome of patch testing). Apparently, those with positive patch test reactions had a decreased risk of having breast cancer and non-melanoma skin cancer, while they had an increased risk of having bladder cancer. Additionally, women with positive patch test reactions had reduced risk of brain\*/CNS cancer (insignificant trend). These associations are interesting since hospitalization bias would generally lead to a positive association and not a negative association. Additionally, possible associations may have been diluted as both cases and controls were from the same database consisting of patch tested dermatitis patient. Population-based studies are often preferable to patient-based studies by virtue of unbiased estimation of prevalence and risk; however when evaluating risk factors for contact allergy they often have limited power

**Deleted:** . ¶  
We chose to use logistic regression analyses for several reasons. First, the time span from the development of ... [1]

value = 0.014, CI95%= 1.02-1.20). Using logistic regression analyses with contact allergy as the dependent variable, we calculated ORs for different cancer groups and adjusted the analysis for sex and age. Breast cancer and non-melanoma skin cancer in both sexes were found to be inversely and significantly associated with contact allergy; for women, there was a trend for an inverse association between contact allergy and brain cancer. Bladder cancer was found to be positively and significantly associated with contact allergy. The sex specific association for brain cancer was identified by investigating different interaction terms between cancer subtypes and sex. However, we found a significant interaction term only for brain/CNS cancer. Thus, when a subsequent adjusted regression analysis was performed only in female dermatitis patients, a trend towards an inverse association was found between brain/CNS cancer and contact allergy (p = 0.080; OR = 0.36 (CI95%= 0.12-1.13). Table 2 shows the ORs for each cancer type, adjusted for age and sex, and the final analysis outcome, which included bladder, breast, brain/CNS and skin cancer (non-melanoma), as well as the brain/cancer\*sex interaction.

## Discussion

We found a significant and inverse association between contact allergy and breast cancer and non-melanoma skin cancer, respectively, as well as a significant and positive association between contact allergy and bladder cancer. Additionally, brain/CNS cancer in women was inversely associated with contact allergy, albeit the p-value was above 0.050 (p-value=0.08).

The allergen database used in the study comprises patients patch tested at Gentofte hospital, and as such the patch tests have been scored uniformly over the years. The hospital lies in the capital region of Denmark, a region where there is limited industrial exposure from pesticide manufacturing, synthetic rubber processing, petrochemical refinery etc., which gives no immediate confounding due to working conditions known to cause cancer.

We did not account for smoking in our study, although smoking may increase the risk of developing nickel contact allergy and some types of cancer<sup>16,17</sup>. However, we found no association with lung

7

1 1 or oral cancers, which are positively associated with smoking<sup>18</sup> but we did find a positive  
 2 2 association with bladder cancer, which could have been partially caused by smoking as smoking is  
 3 3 a known risk factor for bladder cancer.<sup>19</sup> Smoking can also be a risk factor for non-melanoma skin  
 4 4 cancer<sup>20:21</sup> a modest risk factor for brain cancer<sup>22:23</sup> and is speculated to be a risk factor for breast  
 5 5 cancer.<sup>24</sup> However, as these cancer types were inversely associated with contact allergy, a bias  
 6 6 caused by smoking would have weakened the association.  
 7 7 Although most patients with contact allergy have been treated intermittently with topical steroids,  
 8 8 only a minority have been treated with systemic immunosuppressants. The latter treatment might be  
 9 9 associated with non-melanoma skin cancer as TNF- $\alpha$ -inhibitors and prednisolone have been shown  
 10 10 to increase the risk of non-melanoma skin cancer in rheumatoid arthritis patients.<sup>25</sup> Additionally, a  
 11 11 study on squamous cell carcinoma found a positive association in patients hospitalized for chronic  
 12 12 diseases, including skin disease and among these allergic contact dermatitis.<sup>26</sup> In our study, we  
 13 13 found an inverse association between contact allergy and non-melanoma skin cancer, and treatment  
 14 14 biases could therefore have weakened this inverse association.  
 15 15 Self-reported contact eczema has been found to be inversely correlated to glioma and meningioma.<sup>8</sup>  
 16 16 The self-reported contact eczema had the lowest OR of any of the allergic conditions for both  
 17 17 glioma and meningioma, although the confidence interval for meningioma was wide and close to  
 18 18 one. Glioma patients have been shown to have impaired immunity<sup>27</sup> whether the suppression is  
 19 19 evident before diagnosis of the tumour is unknown. It has been suggested that hair dyeing can  
 20 20 increase the risk of glioma<sup>28:29</sup>; however, we found an inverse association even though hair dyeing  
 21 21 is a risk factor for development of e.g. p-phenylenediamine (PPD) contact allergy. Hair dyeing may  
 22 22 also be a risk factor for developing bladder cancer<sup>30:31</sup>. In our study we found a positive association  
 23 23 between contact allergy and bladder cancer, which may be caused by PPD contact allergy. Hair  
 24 24 dyeing does not appear to be related to breast cancer.<sup>32</sup>  
 25 25 It would have been interesting if we had analysed possible associations between specific allergens  
 26 26 and cancer types in the current dataset, but due to lack of power this was not possible.

**Deleted:** <sup>10:11</sup>  
**Deleted:** ). Fourth, it has been suggested that the advantages of Cox regression are mainly found when analyzing high baseline risks which was not the case in this study  
**Deleted:** <sup>17</sup>  
**Deleted:** . ¶  
 The allergy database had a median age of 47 years, and the patients that also appeared in the cancer register had a median age of 60 years. Some of the analyzed patients may therefore develop cancer when they get older; however with a median age of 47 years, some of the malignant tumors may already have developed. It should be emphasized that contact allergy to prevalent allergens such as nickel and cobalt is typically developed early in life, i.e. prior to development of most cancers. There are more females than males in the allergy database, and likewise there are also more females with a positive patch test reactions, which is in accordance with the literature  
**Deleted:** <sup>15</sup>  
**Deleted:** . ¶  
 The present study is unique in the sense that it is only possibly to perform record cross-linkage of registers due to the personal identifier given to all Danish citizens at birth or at immigration. Furthermore, the allergen database is composed of patients patch tested at a hospital in the capital region of Denmark, a region where there is limited indu... [2]  
**Deleted:** <sup>18</sup>  
**Deleted:** . ¶  
 We cannot account for smoking in (... [3]  
**Deleted:** <sup>19:20</sup>  
**Deleted:** . However, we do not find any association to lung or oral cancers (... [4]  
**Deleted:** <sup>21</sup>  
**Deleted:** . We do however find a positive association with bladder c (... [5]  
**Deleted:** <sup>22</sup>  
**Deleted:** . Smoking can additionally be a risk factor for non-melanoma sk (... [6]  
**Deleted:** <sup>23:24</sup>  
**Deleted:** , a modest risk factor for brain cancer  
**Deleted:** <sup>25:26</sup>  
**Deleted:** and might be a risk factor for breast cancer  
**Deleted:** <sup>27</sup>  
**Deleted:** , however as these cancer types were inversely associated w (... [7]  
**Deleted:** <sup>28</sup>  
**Deleted:** . Additionally, a study on squamous cell carcinoma found a (... [8]  
**Deleted:** <sup>29</sup>  
**Deleted:** . In our study, we found an inverse association between conta (... [9]

51  
52  
53  
54  
55  
56  
57  
58  
59  
60

1 1 Various hypotheses have been put forward to explain the associations between allergy and cancer.  
 2  
 3 2 The “antigenic stimulation” hypothesis has been suggested to explain positive associations. In this  
 4  
 5 3 hypothesis it is speculated that the increased stimulation of cell growth in allergy and chronic  
 6  
 7 4 inflammation increases the likelihood of mutation of dividing stem cells and malignant proliferation  
 8  
 9 5 <sup>5</sup> To explain inverse associations, the immunosurveillance hypothesis has been suggested, where  
 10  
 11 6 the allergic symptoms are the side effect of hyperimmunity. Additionally, tumours may suppress the  
 12  
 13 7 immune system systemically and in the microenvironment of the tumour <sup>33</sup> as seen in glioma  
 14  
 15 8 patients, who have a lower count of CD4+T cells overall and an increased fraction of  
 16  
 17 9 CD4+FOXP3+T cells in the remaining fraction <sup>34</sup>

18 10 In conclusion, contact allergy was found to be associated with four different cancer subtypes. Most  
 19  
 20 11 of the associations were inverse, which might support the immunosurveillance hypothesis. The  
 21  
 22 12 reason for these relations is uncertain and not necessarily the result of causality. More refined  
 23  
 24 13 analyses, adjusting for social class, and smoking, for instance, and studies focusing on specific  
 25  
 26 14 chemical exposures are required to further our understanding of the role of contact allergies in the  
 27  
 28 15 development of cancer. However, if these relations are aetiological, there are implications for  
 29  
 30 16 understanding how contact allergy can affect cancer development and vice versa.

31  
 32 17 Our findings add to the limited knowledge of the association between contact allergy and cancer.

### 33 Acknowledgments

34  
 35 18 Financial support from Aage Bang's Foundation and the Capital Region's Research Foundation is  
 36  
 37 19 gratefully acknowledged.  
 38  
 39 20  
 40  
 41  
 42 21

Deleted: <sup>8</sup>

Deleted: . The self-reported contact eczema even had the lowest OR of any of the allergic conditions for both glioma and meningioma, though the confidence interval for meningioma was wide and close to one. Glioma patients have been shown to suffer from impaired immunity

Deleted: <sup>30</sup>

Deleted: , whether the suppression is evident before diagnosis of the tumour is not known. If the reduced risk associated with allergies was an effect of immunosuppression induced by the tumour, current allergic diseases would be expected to be associated with a decreased risk. It has been suggested that hair dyeing can increase the risk of glioma

Deleted: <sup>31;32</sup>

Deleted: ; however we find an inverse association even though hair dyeing is a risk factor for development of e.g. p-phenylenediamine (PPD) contact allergy. Hair dyeing may additionally be a risk factor for the development of bladder cancer <sup>18;33</sup>. In our study we find a positive association between contact allergy and bladder cancer, which may be caused by PPD contact allergy. Hair dyeing does not appear to be related with breast cancer <sup>34</sup>. It would have been interesting if we could have analyzed possible association between specific allergens and the significant cancer types, in the current dataset. However, we do not have enough power to analyze these associations.¶

Different hypothesis have been suggested to explain the association between allergy and cancer. To explain positive associations the “antigenic stimulation” hypothesis has been suggested, in which it is speculated that the increased stimulation of cell growth in allergy and chronic inflammation increase the likelihood of mutation of dividing stem cells and malignant proliferation <sup>5</sup>. To explain inverse associations, the immunosurveillance hypothesis has been suggested in which the allergic symptoms is the side effect of hyperimmunity and are therefore not the result of causation. Additionally, tumours may suppress the immune system systemically and in the microenvironment of the tumour <sup>35</sup>, as seen for glioma patients that have a lower count of CD4+T cells overall and an increased fraction of CD4+FOXP3+T cells in the remaining fraction [... [10]

Deleted: ,

Deleted: e.g.

Deleted: increase

Deleted: etiological, it has

Deleted: Nevertheless, our

Deleted: limit

Deleted: that exists about

Deleted: the hazards of cancers

Deleted: ¶

Deleted: The

## References

- (1) Nielsen NH, Linneberg A, Menne T, Madsen F, Frolund L, Dirksen A et al. Allergic contact sensitization in an adult Danish population: two cross-sectional surveys eight years apart (the Copenhagen Allergy Study). *Acta Derm Venereol* 2001; 81(1):31-34.
- (2) Thyssen JP, Linneberg A, Menne T, Nielsen NH, Johansen JD. Contact allergy to allergens of the TRUE-test (panels 1 and 2) has decreased modestly in the general population. *Br J Dermatol* 2009; 161(5):1124-1129.
- (3) Rustemeyer T, van Hoogstraten IMW, von Blomberg BM, Scheper RJ. Mechanisms in Allergic Contact Dermatitis. In: Frosch PJ, Menné T, Lepoittevin J-P, editors. *Contact Dermatitis*. 4th. ed. Berlin Heidelberg: Springer; 2006. 11-43.
- (4) Vocanson M, Hennino A, Chavagnac C, Saint-Mezard P, Dubois B, Kaiserlian D et al. Contribution of CD4+ and CD8+ T-cells in contact hypersensitivity and allergic contact dermatitis. *Expert Review of Clinical Immunology* 2005; 1(1):75-86.
- (5) Sherman PW, Holland E, Sherman JS. Allergies: Their Role in Cancer Prevention. *Quarterly Review of Biology* 2008; 83(4):339-362.
- (6) Wang H, Diepgen TL. Is atopy a protective or a risk factor for cancer? A review of epidemiological studies. *Allergy* 2005; 60(9):1098-1111.
- (7) Hougeir FG, Yiannias JA, Hinni ML, Hentz JG, el-Azhary RA. Oral metal contact allergy: a pilot study on the cause of oral squamous cell carcinoma. *International Journal of Dermatology* 2006; 45(3):265-271.
- (8) Wigertz A, Lonn S, Schwartzbaum J, Hall P, Auvinen A, Christensen HC et al. Allergic conditions and brain tumor risk. *Am J Epidemiol* 2007; 166(8):941-950.
- (9) Bangsgaard N, Engkilde K, Thyssen JP, Linneberg A, Nielsen NH, Menne T et al. Inverse relationship between contact allergy and psoriasis: results from a patient- and a population-based study. *Br J Dermatol* 2009.
- (10) Engkilde K, Menne T, Johansen JD. Inflammatory bowel disease in relation to contact allergy: a patient-based study. *Scand J Gastroenterol* 2007; 42(5):572-576.
- (11) Engkilde K, Menné T, Johansen JD. Inverse relationship between allergic contact dermatitis and type 1 diabetes mellitus: a retrospective clinic-based study. *Diabetologia* 2006; 49(4):644-647.



- 1 1 (12) Wilkinson DS, Fregert S, Magnusson B, Bandmann HJ, Calnan CD, Cronin E et al.  
2 2 Terminology of contact dermatitis. *Acta Derm Venereol* 1970; 50(4):287-292.  
3  
4  
5 3 (13) Wahlberg JE, Lindberg M. Patch Testing. In: Frosch PJ, Menné T, Lepoittevin J-P, editors.  
6 4 Contact Dermatitis. 4th ed. Berlin Heidelberg: Springer; 2006. 365-390.  
7  
8 5 (14) Carlsen BC, Menne T, Johansen JD. 20 Years of standard patch testing in an eczema  
9 6 population with focus on patients with multiple contact allergies. *Contact Dermatitis* 2007;  
10 7 57(2):76-83.  
11  
12  
13 8 (15) Storm HH, Michelsen EV, Clemmensen IH, Pihl J. The Danish Cancer Registry - history,  
14 9 content, quality and use. *Danish Medical Bulletin* 1997; 44(5):535-539.  
15  
16 10 (16) Linneberg A, Nielsen NH, Menne T, Madsen F, Jorgensen T. Smoking might be a risk  
17 11 factor for contact allergy. *J Allergy Clin Immunol* 2003; 111(5):980-984.  
18  
19  
20 12 (17) Thyssen JP, Johansen JD, Menne T, Nielsen NH, Linneberg A. Effect of Tobacco Smoking  
21 13 and Alcohol Consumption on the Prevalence of Nickel Sensitization and Contact  
22 14 Sensitization. *Acta Dermato-Venereologica* 2010; 90(1):27-33.  
23  
24 15 (18) Gandini S, Botteri E, Iodice S, Boniol M, Lowenfels AB, Maisonneuve P et al. Tobacco  
25 16 smoking and cancer: A meta-analysis. *International Journal of Cancer* 2008; 122(1):155-164.  
26  
27  
28 17 (19) Baris D, Karagas MR, Verrill C, Johnson A, Andrew AS, Marsit CJ et al. A Case-Control  
29 18 Study of Smoking and Bladder Cancer Risk: Emergent Patterns Over Time. *Journal of the  
30 19 National Cancer Institute* 2009; 101(22):1553-1561.  
31  
32  
33 20 (20) De Hertog SAE, Wensveen CAH, Bastiaens MT, Kielich CJ, Berkhout MJP, Westendorp  
34 21 RGJ et al. Relation between smoking and skin cancer. *Journal of Clinical Oncology* 2001;  
35 22 19(1):231-238.  
36  
37 23 (21) Milan T, Verkasalo PK, Kaprio J, Koskenvuo M, Pukkala E. Malignant skin cancers in the  
38 24 Finnish Twin Cohort: a population-based study, 1976-97. *British Journal of Dermatology*  
39 25 2002; 147(3):509-512.  
40  
41  
42 26 (22) Efird JT, Friedman GD, Sidney S, Klatsky A, Habel LA, Udaltsova NV et al. The risk for  
43 27 malignant primary adult-onset glioma in a large, multiethnic, managed-care cohort: cigarette  
44 28 smoking and other lifestyle behaviors. *Journal of Neuro-Oncology* 2004; 68(1):57-69.  
45  
46 29 (23) Silvera SAN, Miller AB, Rohan TE. Cigarette smoking and risk of glioma: A prospective  
47 30 cohort study. *International Journal of Cancer* 2006; 118(7):1848-1851.  
48  
49  
50  
51  
52  
53 11  
54  
55  
56  
57  
58  
59  
60

- 1 1 (24) Cui Y, Miller AB, Rohan TE. Cigarette smoking and breast cancer risk: update of a  
2 2 prospective cohort study. *Breast Cancer Research and Treatment* 2006; 100(3):293-299.  
3  
4  
5 3 (25) Chakravarty EF, Michaud K, Wolfe F. Skin cancer, rheumatoid arthritis, and tumor necrosis  
6 4 factor inhibitors. *Journal of Rheumatology* 2005; 32(11):2130-2135.  
7  
8 5 (26) Jensen AO, Olesen AB, Dethlefsen C, Sorensen HT, Karagas MR. Chronic diseases  
9 6 requiring hospitalization and risk of non-melanoma skin cancers - A population based study  
10 7 from Denmark. *Journal of Investigative Dermatology* 2008; 128(4):926-931.  
11  
12  
13 8 (27) Dix AR, Brooks WH, Roszman TL, Morford LA. Immune defects observed in patients with  
14 9 primary malignant brain tumors. *Journal of Neuroimmunology* 1999; 100(1-2):216-232.  
15  
16 10 (28) Heineman EF, Ward MH, McComb RD, Weisenburger DD, Zahm SH. Hair Dyes and Risk  
17 11 of Glioma Among Nebraska Women. *Cancer Causes and Control* 2005; 16(7):857-864.  
18  
19  
20 12 (29) Bluhm EC, Zahm SH, Fine HA, Black PM, Loeffler JS, Shapiro WR et al. Personal Hair  
21 13 Dye Use and Risks of Glioma, Meningioma, and Acoustic Neuroma among Adults. *Am J*  
22 14 *Epidemiol* 2007; 165(1):63-71.  
23  
24  
25 15 (30) Espinoza F, Silverman D, Kogevinas M, Creus A, Fernandez F, Garcia-Closas M et al.  
26 16 Micronuclei assessment in the urothelial cells of women using hair dyes and its modulation  
27 17 by genetic polymorphisms. *Cancer Lett* 2008; 263(2):259-266.  
28  
29 18 (31) Gago-Dominguez M, Castelao JE, Yuan JM, Yu MC, Ross RK. Use of permanent hair dyes  
30 19 and bladder-cancer risk. *Int J Cancer* 2001; 91(4):575-579.  
31  
32  
33 20 (32) Zheng T, Holford TR, Mayne ST, Owens PH, Boyle P, Zhang B et al. Use of hair colouring  
34 21 products and breast cancer risk: a case-control study in Connecticut. *Eur J Cancer* 2002;  
35 22 38(12):1647-1652.  
36  
37 23 (33) Rabinovich GA, Gabrilovich D, Sotomayor EM. Immunosuppressive strategies that are  
38 24 mediated by tumor cells. *Annual Review of Immunology* 2007; 25:267-296.  
39  
40  
41 25 (34) Fecci PE, Mitchell DA, Whitesides JF, Xie WH, Friedman AH, Archer GE et al. Increased  
42 26 regulatory T-cell fraction amidst a diminished CD4 compartment explains cellular immune  
43 27 defects in patients with malignant glioma. *Cancer Research* 2006; 66(6):3294-3302.  
44  
45 28  
46  
47  
48  
49  
50  
51  
52  
53 12  
54  
55  
56  
57  
58  
59  
60

## Tables

Table 1. Sex specific distribution of cancer types and contact allergy. The cancer types are sorted ascendingly according to the total number of patients with the respective cancer type. Only cancer types with  $\geq 40$  patients were included in the logistic regression analyses.

| CANCER GROUPS (NORDCAN)                | SEX                   |                      |                |                       |                       |                 | TOTAL          |                                                                                  |
|----------------------------------------|-----------------------|----------------------|----------------|-----------------------|-----------------------|-----------------|----------------|----------------------------------------------------------------------------------|
|                                        | Men                   |                      |                | Women                 |                       |                 |                |                                                                                  |
|                                        | No contact allergy    | Contact allergy      | Total          | No contact allergy    | Contact allergy       | Total           |                |                                                                                  |
| Pancreas                               | <u>11</u><br>24.4%    | <u>4</u><br>8.9%     | 15<br>33.3%    | <u>13</u><br>28.9%    | <u>17</u><br>37.8%    | 30<br>66.7%     | 45<br>100%     | Field Code Changed<br>Deleted: $\geq$<br>Deleted: Contact<br>Deleted: No contact |
| Brain/CNS                              | <u>15</u><br>23.8%    | <u>7</u><br>11.1%    | 22<br>34.9%    | <u>30</u><br>47.6%    | <u>11</u><br>17.5%    | 41<br>65.1%     | 63<br>100%     | Deleted: Contact<br>Deleted: No contact<br>Deleted: 11                           |
| Cervix uteri                           | n/a                   | n/a                  | n/a            | <u>34</u><br>53.1%    | <u>30</u><br>46.9%    | 64<br>100%      | 64<br>100%     | Deleted: 7<br>Deleted: 27                                                        |
| Leukaemia                              | <u>27</u><br>38.0%    | <u>7</u><br>9.9%     | 34<br>47.9%    | <u>24</u><br>33.8%    | <u>13</u><br>18.3%    | 37<br>52.1%     | 71<br>100%     | Deleted: Leukemia<br>Deleted: 15                                                 |
| Lip, oral cavity and pharynx           | <u>30</u><br>41.1%    | <u>15</u><br>20.5%   | 45<br>61.6%    | <u>16</u><br>21.9%    | <u>12</u><br>16.4%    | 28<br>38.4%     | 73<br>100%     | Deleted: 30                                                                      |
| Corpus uteri                           | n/a                   | n/a                  | n/a            | <u>48</u><br>55.8%    | <u>38</u><br>44.2%    | 86<br>100%      | 86<br>100%     | Deleted: 14<br>Deleted: 41                                                       |
| Rectum and anus                        | <u>41</u><br>40.6%    | <u>14</u><br>13.9%   | 55<br>54.5%    | <u>29</u><br>28.7%    | <u>17</u><br>16.8%    | 46<br>45.5%     | 101<br>100%    | Deleted: 11<br>Deleted: 32                                                       |
| Melanoma of skin                       | <u>32</u><br>30.8%    | <u>11</u><br>10.6%   | 43<br>41.3%    | <u>40</u><br>38.5%    | <u>21</u><br>20.2%    | 61<br>58.7%     | 104<br>100%    | Deleted: 36<br>Deleted: 86                                                       |
| Prostate                               | <u>86</u><br>70.5%    | <u>36</u><br>29.5%   | 122<br>100%    | n/a                   | n/a                   | n/a             | 122<br>100%    | Deleted: 9<br>Deleted: 43                                                        |
| Colon                                  | <u>43</u><br>34.7%    | <u>9</u><br>7.3%     | 52<br>41.9%    | <u>43</u><br>34.7%    | <u>29</u><br>23.4%    | 72<br>58.1%     | 124<br>100%    | Deleted: 63<br>Deleted: 26                                                       |
| Bladder etc.                           | <u>63</u><br>45.3%    | <u>33</u><br>23.7%   | 96<br>69.1%    | <u>21</u><br>15.1%    | <u>22</u><br>15.8%    | 43<br>30.9%     | 139<br>100%    | Deleted: 83<br>Deleted: 23                                                       |
| Lung                                   | <u>83</u><br>43.2%    | <u>26</u><br>13.5%   | 109<br>56.8%   | <u>41</u><br>21.4%    | <u>42</u><br>21.9%    | 83<br>43.2%     | 192<br>100%    | Deleted: 83<br>Deleted: 23                                                       |
| Colorectal                             | <u>83</u><br>37.2%    | <u>23</u><br>10.3%   | 106<br>47.5%   | <u>71</u><br>31.8%    | <u>46</u><br>20.6%    | 117<br>52.5%    | 223<br>100%    | Deleted: 83<br>Deleted: 72                                                       |
| Breast                                 | 0                     | 0                    | 0              | <u>248</u><br>62.2%   | <u>151</u><br>37.8%   | 399<br>100%     | 399<br>100%    | Deleted: 203<br>Deleted: 209                                                     |
| Skin, non-melanoma                     | <u>203</u><br>28.0%   | <u>72</u><br>9.9%    | 275<br>37.9%   | <u>284</u><br>39.2%   | <u>166</u><br>22.9%   | 450<br>62.1%    | 725<br>100%    | Deleted: 531                                                                     |
| All sites but non-melanoma skin cancer | <u>531</u><br>28.6%   | <u>209</u><br>11.3%  | 740<br>39.9%   | <u>663</u><br>35.7%   | <u>452</u><br>24.4%   | 1,115<br>60.1%  | 1,855<br>100%  | Deleted: 1,594<br>Deleted: 519                                                   |
| Total(allergy database)                | <u>4,519</u><br>26.7% | <u>1,594</u><br>9.4% | 6,113<br>36.1% | <u>4,471</u><br>26.4% | <u>6,338</u><br>37.5% | 10,809<br>63.9% | 16,922<br>100% |                                                                                  |

**Table**  
**Logistic analysis for the individual cancer group adjusted for age and sex. The last six rows are the final analysis outcome with the interaction variable and the significant cancer groups.**

**Field Code Changed**  
**Deleted:** The final analysis outcome including the interaction variable Brain/CNS\*Sex, all adjusted for age and sex¶  
 Cancer groups (NORDCAN) ... [11]

| Cancer groups (NORDCAN)                                | p-value               | OR                   | CI 95%                    |
|--------------------------------------------------------|-----------------------|----------------------|---------------------------|
| <a href="#">Pancreas</a>                               | <a href="#">0.184</a> | <a href="#">1.50</a> | <a href="#">0.83–2.72</a> |
| <a href="#">Brain/CNS</a>                              | <a href="#">0.159</a> | <a href="#">0.66</a> | <a href="#">0.38–1.16</a> |
| <a href="#">Cervix uteri</a>                           | <a href="#">0.503</a> | <a href="#">1.18</a> | <a href="#">0.73–1.94</a> |
| <a href="#">Leukaemia</a>                              | <a href="#">0.233</a> | <a href="#">0.73</a> | <a href="#">0.43–1.23</a> |
| <a href="#">Lip, oral cavity and pharynx</a>           | <a href="#">0.496</a> | <a href="#">1.18</a> | <a href="#">0.73–1.92</a> |
| <a href="#">Corpus uteri</a>                           | <a href="#">0.797</a> | <a href="#">1.06</a> | <a href="#">0.69–1.62</a> |
| <a href="#">Rectum and anus</a>                        | <a href="#">0.470</a> | <a href="#">0.85</a> | <a href="#">0.55–1.31</a> |
| <a href="#">Melanoma of skin</a>                       | <a href="#">0.262</a> | <a href="#">0.79</a> | <a href="#">0.51–1.20</a> |
| <a href="#">Prostate</a>                               | <a href="#">0.455</a> | <a href="#">1.16</a> | <a href="#">0.78–1.73</a> |
| <a href="#">Colon</a>                                  | <a href="#">0.215</a> | <a href="#">0.78</a> | <a href="#">0.53–1.15</a> |
| <a href="#">Bladder etc.</a>                           | <a href="#">0.039</a> | <a href="#">1.44</a> | <a href="#">1.02–2.05</a> |
| <a href="#">Lung</a>                                   | <a href="#">0.720</a> | <a href="#">1.06</a> | <a href="#">0.78–1.43</a> |
| <a href="#">Colorectal</a>                             | <a href="#">0.187</a> | <a href="#">0.82</a> | <a href="#">0.61–1.10</a> |
| <a href="#">Breast</a>                                 | <a href="#">0.031</a> | <a href="#">0.80</a> | <a href="#">0.65–0.98</a> |
| <a href="#">Skin, non-melanoma</a>                     | <a href="#">0.020</a> | <a href="#">0.82</a> | <a href="#">0.70–0.97</a> |
| <a href="#">All sites but non-melanoma skin cancer</a> | <a href="#">0.415</a> | <a href="#">0.96</a> | <a href="#">0.86–1.06</a> |
| <b>Final logistic analysis</b>                         |                       |                      |                           |
| <a href="#">Bladder etc.</a>                           | <a href="#">0.040</a> | <a href="#">1.44</a> | <a href="#">1.02–2.05</a> |
| <a href="#">Breast</a>                                 | <a href="#">0.035</a> | <a href="#">0.80</a> | <a href="#">0.65–0.98</a> |
| <a href="#">Skin, non-melanoma</a>                     | <a href="#">0.021</a> | <a href="#">0.83</a> | <a href="#">0.70–0.97</a> |
| <a href="#">Brain/CNS</a>                              | <a href="#">0.513</a> | <a href="#">1.35</a> | <a href="#">0.55–3.33</a> |
| <a href="#">Brain/CNS *Sex</a>                         | <a href="#">0.080</a> | <a href="#">0.36</a> | <a href="#">0.12–1.13</a> |

review only

1  
2  
3 **Page 7: [1] Deleted**

**Forfatter**

4  
5  
6  
7 We chose to use logistic regression analyses for several reasons. First, the time span from  
8 the development of contact allergy to the diagnosis was established is unknown and  
9 likewise for cancer. Second, our objective was not to establish causality but rather to test  
10 whether a skewed immune system towards delayed type hypersensitivity is positively or  
11 negatively associated with cancer. Third, we have with success applied this type of  
12 regression analysis in previous studies investigating diabetes and inflammatory bowel  
13 disease (  
14  
15  
16  
17  
18  
19  
20  
21  
22  
23

24 **Page 8: [2] Deleted**

**Forfatter**

25  
26  
27 The present study is unique in the sense that it is only possibly to perform record cross-  
28 linkage of registers due to the personal identifier given to all Danish citizens at birth or at  
29 immigration. Furthermore, the allergen database is composed of patients patch tested at a  
30 hospital in the capital region of Denmark, a region where there is limited industrial  
31 exposure due to pesticide manufacturing, synthetic rubber processing, petrochemical  
32 refinery etc. that might lead to cancer. Instead many of the patients with contact allergy  
33 are allergic to cosmetic ingredients and metals from jewellery which gives no immediate  
34 confounding due to working conditions known to cause cancer. A negative patch test  
35 response might be due to tolerance of the individual as most individuals are exposed to  
36 contact allergens, and a positive patch test response could therefore be implicative of an  
37 efficient immune system lending support to the immunosurveillance hypothesis. The  
38 positive association to bladder cancer might be due to accumulations of metabolites from  
39  
40  
41  
42  
43  
44  
45  
46  
47  
48  
49  
50  
51  
52  
53  
54  
55  
56  
57  
58  
59  
60

1  
2  
3 contact allergens in the bladder, which is somewhat supported by a study showing an  
4  
5 increased frequency of micronuclei in urothelial cells of hair dye users  
6  
7

8  
9 **Page 8: [3] Deleted**

**Forfatter**

10  
11  
12 We cannot account for smoking in our study, although smoking may increase the risk of  
13  
14 developing nickel contact allergy and some types of cancer  
15  
16

17  
18 **Page 8: [4] Deleted**

**Forfatter**

19  
20 . However, we do not find any association to lung or oral cancers, which are positively  
21  
22 associated with smoking  
23

24  
25 **Page 8: [5] Deleted**

**Forfatter**

26  
27 . We do however find a positive association with bladder cancer that could be somewhat  
28  
29 caused by smoking, as smoking is a known risk factor for bladder cancer  
30

31  
32 **Page 8: [6] Deleted**

**Forfatter**

33  
34 . Smoking can additionally be a risk factor for non-melanoma skin cancer  
35

36  
37 **Page 8: [7] Deleted**

**Forfatter**

38  
39 , however as these cancer types were inversely associated with contact allergy , a bias  
40  
41 caused by smoking would therefore rather have weakened the association. Most of  
42  
43 contact allergy patients have been treated intermittently with topical steroids and only a  
44  
45 minority with systemic immunosuppressants. The later treatment may be associated with  
46  
47 non-melanoma skin cancer as TNF- $\alpha$ -inhibitors and prednisone have been shown to  
48  
49 increase the risk of non-melanoma skin cancer in rheumatoid arthritis patients  
50

51  
52 **Page 8: [8] Deleted**

**Forfatter**

53  
54 . Additionally, a study on squamous cell carcinoma found a positive association in  
55  
56 patients hospitalized for chronic diseases including skin disease and among these allergic  
57  
58 contact dermatitis  
59  
60

1  
2  
3  
4 **Page 8: [9] Deleted**

**Forfatter**

5 . In our study, we found an inverse association between contact allergy and non-  
6 melanoma skin cancer, and treatment bias could possibly have weakened this inverse  
7 association  
8

9  
10 Self-reported contact eczema have previously been found to be inversely correlated to  
11 glioma and meningioma  
12  
13  
14  
15

16  
17  
18 **Page 9: [10] Deleted**

**Forfatter**

19 ; however we find an inverse association even though hair dyeing is a risk factor for  
20 development of e.g. p-phenylenediamine (PPD) contact allergy. Hair dyeing may  
21 additionally be a risk factor for the development of bladder cancer <sup>18;33</sup>. In our study we  
22 find a positive association between contact allergy and bladder cancer, which may be  
23 caused by PPD contact allergy. Hair dyeing does not appear to be related with breast  
24 cancer <sup>34</sup>. It would have been interesting if we could have analyzed possible association  
25 between specific allergens and the significant cancer types, in the current dataset.  
26 However, we do not have enough power to analyze these associations.  
27

28  
29 Different hypothesis have been suggested to explain the association between allergy and  
30 cancer. To explain positive associations the “antigenic stimulation” hypothesis has been  
31 suggested, in which it is speculated that the increased stimulation of cell growth in  
32 allergy and chronic inflammation increase the likelihood of mutation of dividing stem  
33 cells and malignant proliferation <sup>5</sup>. To explain inverse associations, the  
34 immunosurveillance hypothesis has been suggested in which the allergic symptoms is the  
35 side effect of hyperimmunity and are therefore not the result of causation. Additionally,  
36 tumours may suppress the immune system systemically and in the microenvironment of  
37  
38  
39  
40  
41  
42  
43  
44  
45  
46  
47  
48  
49  
50  
51  
52  
53  
54  
55  
56  
57  
58  
59  
60

the tumour <sup>35</sup>, as seen for glioma patients that have a lower count of CD4+T cells overall and an increased fraction of CD4+FOXP3+T cells in the remaining fraction <sup>36</sup>

Page 14: [11] Deleted

Forfatter

The final analysis outcome including the interaction variable Brain/CNS\*Sex, all adjusted for age and sex

| Cancer groups (NORDCAN) | ICD7 | ICD10                 | p-value | OR   | CI 95%      |
|-------------------------|------|-----------------------|---------|------|-------------|
| Bladder etc.            | 181  | C65-68+ D09.0 + D41.4 | 0.040   | 1.44 | 1.02 - 2.05 |
| Breast                  | 170  | C50                   | 0.035   | 0.80 | 0.65 - 0.98 |
| Skin, non-melanoma      | 191  | C44+C46.0             | 0.021   | 0.83 | 0.70 - 0.97 |
| Brain/CNS               | 193  | C70-72+D32-33+D42-43  | 0.513   | 1.35 | 0.55 - 3.33 |
| Brain/CNS *Sex          | -    | -                     | 0.080   | 0.36 | 0.12 - 1.13 |



STROBE Statement—Checklist of items that should be included in reports of *cohort studies*

|                              | Item No | Recommendation                                                                                                                                                                              |
|------------------------------|---------|---------------------------------------------------------------------------------------------------------------------------------------------------------------------------------------------|
| <b>Title and abstract</b>    | 1       | (a) Indicate the study's design with a commonly used term in the title or the abstract<br>Yes "a linkage Study" in the title                                                                |
|                              |         | (b) Provide in the abstract an informative and balanced summary of what was done and what was found<br>Yes                                                                                  |
| <b>Introduction</b>          |         |                                                                                                                                                                                             |
| Background/rationale         | 2       | Explain the scientific background and rationale for the investigation being reported<br>Yes, explain that type 1 allergy associations have previously been reported and that                |
| Objectives                   | 3       | State specific objectives, including any prespecified hypotheses<br>YES                                                                                                                     |
| <b>Methods</b>               |         |                                                                                                                                                                                             |
| Study design                 | 4       | Present key elements of study design early in the paper<br>YES                                                                                                                              |
| Setting                      | 5       | Describe the setting, locations, and relevant dates, including periods of recruitment, exposure, follow-up, and data collection<br>YES                                                      |
| Participants                 | 6       | (a) Give the eligibility criteria, and the sources and methods of selection of participants. Describe methods of follow-up<br>YES                                                           |
|                              |         | (b) For matched studies, give matching criteria and number of exposed and unexposed                                                                                                         |
| Variables                    | 7       | Clearly define all outcomes, exposures, predictors, potential confounders, and effect modifiers. Give diagnostic criteria, if applicable<br>YES                                             |
| Data sources/<br>measurement | 8*      | For each variable of interest, give sources of data and details of methods of assessment (measurement). Describe comparability of assessment methods if there is more than one group<br>YES |
| Bias                         | 9       | Describe any efforts to address potential sources of bias<br>YES                                                                                                                            |
| Study size                   | 10      | Explain how the study size was arrived at<br>YES                                                                                                                                            |
| Quantitative variables       | 11      | Explain how quantitative variables were handled in the analyses. If applicable, describe which groupings were chosen and why<br>YES                                                         |
| Statistical methods          | 12      | (a) Describe all statistical methods, including those used to control for confounding<br>YES                                                                                                |
|                              |         | (b) Describe any methods used to examine subgroups and interactions<br>YES                                                                                                                  |
|                              |         | (c) Explain how missing data were addressed<br>N/A                                                                                                                                          |
|                              |         | (d) If applicable, explain how loss to follow-up was addressed<br>N/A                                                                                                                       |
|                              |         | (e) Describe any sensitivity analyses<br>N/A                                                                                                                                                |

| <b>Results</b>           |     |                                                                                                                                                                                                                                                                                                                                                                                                                                                       |
|--------------------------|-----|-------------------------------------------------------------------------------------------------------------------------------------------------------------------------------------------------------------------------------------------------------------------------------------------------------------------------------------------------------------------------------------------------------------------------------------------------------|
| Participants             | 13* | (a) Report numbers of individuals at each stage of study—eg numbers potentially eligible, examined for eligibility, confirmed eligible, included in the study, completing follow-up, and analysed<br>YES were applicable<br>(b) Give reasons for non-participation at each stage<br>N/A<br>(c) Consider use of a flow diagram<br>Not used                                                                                                             |
| Descriptive data         | 14* | (a) Give characteristics of study participants (eg demographic, clinical, social) and information on exposures and potential confounders<br>Not possible<br>(b) Indicate number of participants with missing data for each variable of interest<br>Register data<br>(c) Summarise follow-up time (eg, average and total amount)<br>N/A                                                                                                                |
| Outcome data             | 15* | Report numbers of outcome events or summary measures over time<br>YES                                                                                                                                                                                                                                                                                                                                                                                 |
| Main results             | 16  | (a) Give unadjusted estimates and, if applicable, confounder-adjusted estimates and their precision (eg, 95% confidence interval). Make clear which confounders were adjusted for and why they were included<br>YES<br>(b) Report category boundaries when continuous variables were categorized<br>No continuous variable<br>(c) If relevant, consider translating estimates of relative risk into absolute risk for a meaningful time period<br>N/A |
| Other analyses           | 17  | Report other analyses done—eg analyses of subgroups and interactions, and sensitivity analyses<br>YES                                                                                                                                                                                                                                                                                                                                                 |
| <b>Discussion</b>        |     |                                                                                                                                                                                                                                                                                                                                                                                                                                                       |
| Key results              | 18  | Summarise key results with reference to study objectives<br>YES                                                                                                                                                                                                                                                                                                                                                                                       |
| Limitations              | 19  | Discuss limitations of the study, taking into account sources of potential bias or imprecision. Discuss both direction and magnitude of any potential bias<br>YES                                                                                                                                                                                                                                                                                     |
| Interpretation           | 20  | Give a cautious overall interpretation of results considering objectives, limitations, multiplicity of analyses, results from similar studies, and other relevant evidence<br>YES                                                                                                                                                                                                                                                                     |
| Generalisability         | 21  | Discuss the generalisability (external validity) of the study results<br>YES                                                                                                                                                                                                                                                                                                                                                                          |
| <b>Other information</b> |     |                                                                                                                                                                                                                                                                                                                                                                                                                                                       |
| Funding                  | 22  | Give the source of funding and the role of the funders for the present study and, if applicable, for the original study on which the present article is based<br>No specific funding for the present paper, but 2 general grants, mentioned in the Acknowledgments section                                                                                                                                                                            |

1 \*Give information separately for exposed and unexposed groups.  
2  
3

4 **Note:** An Explanation and Elaboration article discusses each checklist item and gives methodological background and  
5 published examples of transparent reporting. The STROBE checklist is best used in conjunction with this article (freely  
6 available on the Web sites of PLoS Medicine at <http://www.plosmedicine.org/>, Annals of Internal Medicine at  
7 <http://www.annals.org/>, and Epidemiology at <http://www.epidem.com/>). Information on the STROBE Initiative is  
8 available at <http://www.strobe-statement.org>.  
9  
10  
11  
12  
13  
14  
15  
16  
17  
18  
19  
20  
21  
22  
23  
24  
25  
26  
27  
28  
29  
30  
31  
32  
33  
34  
35  
36  
37  
38  
39  
40  
41  
42  
43  
44  
45  
46  
47  
48  
49  
50  
51  
52  
53  
54  
55  
56  
57  
58  
59  
60

For peer review only
